# Supplementary material
Source: MDPI journal article supplement (https://www.mdpi.com/2413-8851/8/2/41)
Supplement: s1 [file s1]

**Table S1.** Summary database of block scale

| Author, Year                        | Country   | Climate | Site Classification  | Vegetation Scene | Arrangements Type | Vegetation Parameters |   |   | Research Data | Analysis Method |    |        | Experimental Variables |   |   |   | Research Scope      | Season |    |        |        | Software           |
|-------------------------------------|-----------|---------|----------------------|------------------|-------------------|-----------------------|---|---|---------------|-----------------|----|--------|------------------------|---|---|---|---------------------|--------|----|--------|--------|--------------------|
|                                     |           |         |                      |                  |                   | P                     | B | S |               | M<br>s          | Si | M<br>o | P                      | B | S | C |                     | Sp     | Su | A<br>u | W<br>i |                    |
| Cao et al., 2010                    | Japan     | Cfa     | Park                 | Group            | Mixed             |                       |   | • | Descriptive   | •               |    |        |                        |   |   |   | Surface temperature | •      | •  | •      |        | N/A                |
| Fahmy et al., 2010                  | Egypt     | Bwh     | Private Garden       | Group            | Mixed             | •                     |   |   | Experimental  | •               | •  |        |                        | • | • |   | Air temperature     |        | •  |        |        | ENVI-met ©         |
| Gómez-Muñoz et al., 2010            | Mexico    | Cwb     | Street               | Unit             | Individual        | •                     |   |   | Descriptive   | •               |    |        |                        |   |   |   | Energy              |        |    |        |        | N/A                |
| Pandit & Laband, 2010               | USA       | Cfa     | Building             | Group            | N/A               | •                     |   |   | Descriptive   | •               |    |        |                        |   |   |   | Energy              |        | •  |        | •      | N/A                |
| Shahidan et al., 2010               | Malaysia  | Af      | Educational facility | Group            | Aligned           | •                     |   |   | Descriptive   | •               |    | •      |                        |   |   |   | Others              |        |    |        | •      | Autodesk® Ecotect® |
| Shashua-Bar, Tsiros, et al., 2010   | Greece    | Csa     | Street               | Group            | Aligned           |                       |   | • | Experimental  | •               |    |        |                        |   | • |   | Air temperature     |        | •  | •      |        | N/A                |
| Shashua-Bar, Potchter, et al., 2010 | Israel    | Csa     | Park                 | Group            | Mixed             |                       |   | • | Experimental  | •               |    |        |                        |   | • |   | Air temperature     |        | •  |        |        | N/A                |
| Tsiros, 2010                        | Greece    | Csa     | Street               | Group            | N/A               |                       |   | • | Descriptive   | •               |    |        |                        |   |   |   | Air temperature     |        | •  |        |        | N/A                |
| Wong & Jusuf, 2010                  | Singapore | Af      | Street               | Group            | Aligned           |                       |   | • | Descriptive   | •               |    |        |                        |   |   |   | Air temperature     |        | •  |        |        | Rayman             |
| Gaitani et al., 2011                | Greece    | Csa     | Park                 | Group            | Mixed             |                       |   | • | Descriptive   |                 | •  |        |                        |   |   |   | Air temperature     |        | •  |        |        | CFD-PHOENICS       |
| Shashua-Bar et al., 2011            | Israel    | Bwk     | Educational facility | Group            | Aligned           | •                     | • | • | Experimental  | •               |    |        |                        |   | • |   | Comfort             |        | •  |        |        | N/A                |
| Armson et al., 2012                 | UK        | Cfb     | Park                 | Group            | Aligned           | •                     |   | • | Descriptive   | •               |    |        |                        |   |   |   | Mixed               |        | •  |        |        | N/A                |
| Bencheikh & Rchid, 2012             | Argelia   | Bwh     | Street               | Group            | Mixed             |                       |   | • | Descriptive   | •               |    |        |                        |   |   |   | Air temperature     |        |    | •      |        | N/A                |
| Cohen et al., 2012                  | Israel    | Csa     | Park                 | Group            | Mixed             | •                     |   | • | Descriptive   | •               |    |        |                        |   |   |   | Air temperature     | •      | •  | •      | •      | Rayman             |
| Correa et al., 2012                 | Argentina | Bwk     | Street               | Group            | Aligned           | •                     |   |   | Descriptive   | •               |    |        |                        |   |   |   | Comfort             |        | •  |        |        | Pixel de Cielo     |
| Enete et al., 2012                  | Nigeria   | Aw      | Street               | Unit             | N/A               |                       |   | • | Descriptive   | •               |    |        |                        |   |   |   | Air temperature     | •      | •  |        |        | N/A                |
| Lu et al., 2012                     | China     | Cwa     | Park                 | Group            | Mixed             |                       |   | • | Descriptive   | •               |    |        |                        |   |   |   | Air temperature     |        | •  |        |        | SPSS software      |
| Park et al., 2012                   | Japan     | Cfa     | Street               | Group            | Mixed             |                       |   | • | Experimental  | •               |    |        |                        |   | • | • | Comfort             |        | •  | •      |        | N/A                |
| Shashua-Bar et al., 2012            | Greece    | Csa     | Street               | Group            | N/A               |                       |   | • | Experimental  | •               |    | •      |                        |   | • |   | Comfort             |        | •  |        |        | ENVI-met ©         |
| Yan et al., 2012                    | China     | Dwa     | Park                 | Group            | Dense             | •                     |   | • | Descriptive   | •               |    |        |                        |   |   |   | Air temperature     |        | •  |        |        | SPSS software      |
| Armson et al., 2013                 | UK        | Cfb     | Street               | Unit             | Individual        | •                     | • |   | Descriptive   | •               |    |        |                        |   |   |   | Surface temperature |        | •  |        |        | SPSS software      |
| Charalampopoulos et al., 2013       | Greece    | Csa     | N/A                  | Group            | Mixed             | •                     |   |   | Descriptive   | •               | •  |        |                        |   |   |   | Comfort             |        | •  |        |        | Rayman             |
| Morakinyo et al., 2013              | Nigeria   | Aw      | Educational facility | Group            | Clustered         |                       |   | • | Descriptive   | •               |    |        |                        |   |   |   | Air temperature     | •      | •  | •      | •      | SPSS software      |
| Qin et al., 2013                    | China     | Cfa     | Park                 | Group            | Mixed             | •                     |   | • | Descriptive   | •               |    |        |                        |   |   |   | Comfort             | •      |    |        |        | N/A                |
| Vailshery et al., 2013              | India     | Aw      | Street               | Group            | N/A               |                       |   | • | Descriptive   | •               |    |        |                        |   |   |   | Air temperature     |        | •  |        |        | STATISTICA™        |
| Vidrih & Medved, 2013               | Slovenia  | Cfb     | Park                 | Group            | Mixed             | •                     | • |   | Experimental  | •               | •  |        | •                      |   | • |   | Air temperature     |        | •  |        |        | Fluent             |
| Zhang et al., 2013                  | China     | Cfa     | Park                 | Group            | Mixed             | •                     |   |   | Descriptive   | •               |    |        |                        |   | • |   | Air temperature     | •      | •  | •      | •      | SPSS software      |
| Asikin et al., 2014                 | Indonesia | Aw      | Private Garden       | Group            | Aligned           | •                     |   |   | Experimental  | •               |    |        |                        | • | • |   | Air temperature     |        |    | •      |        | N/A                |
| Balogun et al., 2014                | Nigeria   | Aw      | Educational facility | Group            | Clustered         | •                     |   | • | Descriptive   | •               |    |        |                        |   |   |   | Energy              | •      | •  |        |        | N/A                |
| Feyisa et al., 2014                 | Ethiopia  | Cwb     | Park                 | Group            | Mixed             | •                     |   | • | Descriptive   | •               |    |        |                        |   |   |   | Surface temperature |        |    | •      |        | ArcGIS ©           |
| Millward et al., 2014               | Canada    | Dfb     | Educational facility | Mixed            | Mixed             | •                     |   |   | Descriptive   | •               |    |        |                        |   |   |   | Surface temperature |        | •  |        |        | SAS/STAT Software  |
| Morakinyo et al., 2014              | Nigeria   | Aw      | Educational facility | Group            | Clustered         |                       |   | • | Descriptive   | •               |    |        |                        |   |   |   | Comfort             | •      | •  | •      | •      | N/A                |
| Rashid et al., 2014                 | Malaysia  | Af      | Park                 | Group            | N/A               | •                     |   |   | Descriptive   | •               |    |        |                        |   |   |   | Air temperature     |        |    |        |        | N/A                |

| Author, Year                       | Country     | Climate | Site Classification  | Vegetation Scene | Arrangements Type | Vegetation Parameters |   |   | Research Data | Analysis Method |    |        | Experimental Variables |   |   |   | Research Scope     | Season |    |        |        | Software             |
|------------------------------------|-------------|---------|----------------------|------------------|-------------------|-----------------------|---|---|---------------|-----------------|----|--------|------------------------|---|---|---|--------------------|--------|----|--------|--------|----------------------|
|                                    |             |         |                      |                  |                   | P                     | B | S |               | M<br>s          | Si | M<br>o | P                      | B | S | C |                    | Sp     | Su | A<br>u | W<br>i |                      |
| Tsiros & Hoffman, 2014             | Greece      | Csa     | Private Garden       | Group            | Dense             | •                     |   | • | Descriptive   | •               |    |        |                        |   |   |   | Air temperature    |        | •  |        |        | Rayman               |
| Abdel-Aziz et al., 2015            | Jordan      | BSH     | Building             | Group            | Aligned           | •                     |   | • | Experimental  | •               |    |        |                        |   | • |   | Energy             |        | •  | •      |        | N/A                  |
| Chatzidimitriou & Yannas, 2015     | Greece      | Cfa     | Park                 | Group            | Mixed             | •                     |   | • | Descriptive   | •               | •  |        |                        |   |   |   | Air temperature    |        | •  |        |        | ENVI-met ©           |
| de Abreu-Harbach et al., 2015      | Brazil      | Cfa     | Park                 | Mixed            | Mixed             | •                     |   |   | Descriptive   | •               |    |        |                        |   |   |   | Comfort            |        | •  |        | •      | Rayman               |
| Gillner et al., 2015               | Germany     | Dfb     | Street               | Group            | N/A               | •                     |   |   | Descriptive   | •               |    |        |                        |   |   |   | Mixed              |        | •  |        |        | LAI-2200 File Viewer |
| Gromke et al., 2015                | Netherlands | Cfb     | Street               | Group            | Aligned           | •                     | • |   | Experimental  |                 | •  |        |                        |   | • |   | Air temperature    |        | •  |        |        | ANSYS FLUENT         |
| Klemm et al., 2015                 | Netherlands | Cfb     | Street               | Group            | Aligned           | •                     |   | • | Descriptive   | •               |    |        |                        |   |   |   | Comfort            |        | •  |        |        | SPSS software        |
| Lobaccaro & Acero, 2015            | Spain       | Cfb     | Street               | Group            | Aligned           |                       |   | • | Experimental  | •               | •  |        |                        | • | • | • | Comfort            |        | •  |        |        | ENVI-met ©           |
| Noro & Lazzarin, 2015              | Italy       | Cfa     | Square               | Group            | Mixed             | •                     |   | • | Experimental  |                 | •  |        |                        |   |   |   | Air temperature    |        | •  |        |        | ENVI-met ©           |
| Rahman et al., 2015                | UK          | Cfb     | Street               | Unit             | Individual        | •                     | • |   | Descriptive   | •               |    |        |                        |   |   |   | Energy             | •      | •  | •      |        | SPSS software        |
| Gaitani et al., 2011               | Greece      | Csa     | Park                 | Group            | Mixed             |                       |   | • | Descriptive   |                 | •  |        |                        |   |   |   | Air temperature    |        | •  |        |        | CFD-PHOENICS         |
| Salata et al., 2015                | Italy       | Csa     | Building             | Group            | N/A               |                       |   | • | Experimental  | •               | •  |        |                        |   | • |   | Air temperature    |        | •  |        | •      | ENVI-met ©           |
| Shahidan, 2015                     | Malaysia    | Af      | N/A                  | Unit             | Individual        | •                     |   |   | Descriptive   | •               | •  |        |                        |   |   |   | Air temperature    |        |    |        | •      | ENVI-met ©           |
| Wang Y., et al., 2015              | Netherlands | Cfb     | Private Garden       | Group            | Scattered         | •                     |   |   | Descriptive   | •               |    |        |                        |   |   |   | Comfort            | •      | •  |        |        | Rayman               |
| Wang Y.,et al., 2015               | Netherlands | Cfb     | Private Garden       | Group            | Scattered         | •                     |   | • | Descriptive   | •               | •  |        |                        |   |   |   | Air temperature    |        | •  |        | •      | ENVI-met ©           |
| Yoshida et al., 2015               | Japan       | Cfa     | Front garden         | Group            | Mixed             | •                     |   | • | Descriptive   | •               |    |        |                        |   |   |   | Air temperature    |        | •  |        |        | N/A                  |
| Al-Gretawee et al., 2016           | Australia   | Cfb     | Park                 | Group            | Mixed             |                       |   | • | Descriptive   | •               |    |        |                        |   |   |   | Mixed              |        |    | •      |        | N/A                  |
| Calcerano & Martinelli, 2016       | Italy       | Csa     | Building             | Mixed            | Mixed             | •                     |   | • | Experimental  | •               | •  |        |                        |   | • |   | Energy             |        |    |        |        | Energy Plus          |
| Coutts, White, et al., 2016        | Australia   | Cfb     | Street               | Group            | Aligned           | •                     |   | • | Descriptive   | •               |    |        |                        |   |   |   | Air temperature    | •      | •  | •      | •      | Rayman               |
| El-Bardisy et al., 2016            | Egypt       | BWh     | Educational facility | Group            | Mixed             | •                     |   |   | Experimental  |                 | •  |        |                        | • | • |   | Comfort            |        | •  |        |        | ENVI-met ©           |
| Hsieh et al., 2016                 | Taiwan      | Aw      | Park                 | Group            | N/A               | •                     |   |   | Descriptive   | •               | •  |        |                        |   |   |   | Comfort            |        | •  |        |        | CFD Software         |
| Konarska et al., 2016              | Sweden      | Cfb     | Street               | Group            | Mixed             | •                     |   | • | Descriptive   | •               |    | •      |                        |   |   |   | Air temperature    | •      | •  | •      | •      | SOLWEIG              |
| Kong, Sun, et al., 2016            | China       | Cfa     | Educational facility | Group            | Mixed             |                       |   | • | Experimental  | •               | •  |        |                        |   | • |   | Energy             |        | •  |        |        | ENVI-met ©           |
| Kong, Yan, et al., 2016            | China       | Cfa     | Urban Forest         | Unit             | Dense             | •                     |   |   | Descriptive   | •               |    | •      |                        |   |   |   | Air temperature    |        | •  |        |        | Gap Light Analyze©   |
| Lindén et al., 2016                | Germany     | Cfb     | Park                 | Group            | Mixed             | •                     | • | • | Descriptive   | •               |    |        |                        |   |   |   | Evapotranspiration |        | •  |        |        | N/A                  |
| Morakinyo & Lam, 2016              | China       | Cwa     | Street               | Group            | Aligned           | •                     |   | • | Experimental  | •               | •  |        | •                      |   |   | • | Comfort            |        | •  |        |        | ENVI-met ©           |
| Ryu et al., 2016                   | Switzerland | Cfb     | Street               | Group            | Individual        | •                     | • | • | Experimental  | •               |    |        | •                      |   |   |   | Air temperature    |        | •  |        |        | N/A                  |
| Wang Z. H.,et al., 2016            | USA         | Bwh     | Street               | Group            | N/A               | •                     | • |   | Descriptive   | •               |    |        |                        |   |   |   | Mixed              | •      | •  | •      | •      | N/A                  |
| Zheng S. et al., 2016              | China       | Dwa     | Park                 | Group            | N/A               | •                     |   | • | Descriptive   | •               | •  |        |                        |   |   |   | Comfort            | •      | •  |        |        | Fluent               |
| Huang K. T. & Li, 2017             | Taiwan      | Cfa     | Street               | Group            | Aligned           | •                     |   | • | Experimental  | •               | •  |        |                        |   | • |   | Energy             |        | •  |        |        | ENVI-met ©           |
| Kong L. et al., 2017               | China       | Cwa     | Street               | Unit             | Mixed             | •                     |   |   | Experimental  | •               |    | •      | •                      | • |   | • | Comfort            |        | •  |        |        | SOLWEIG              |
| Milošević et al., 2017             | Serbia      | Cfb     | Parking lot          | Group            | Scattered         | •                     |   | • | Experimental  | •               | •  |        |                        |   | • |   | Comfort            | •      | •  | •      | •      | Rhinoceros           |
| Rahman et al., 2017                | Germany     | Cfb     | Street               | Group            | Mixed             | •                     | • |   | Descriptive   | •               |    |        |                        |   |   |   | Air temperature    |        | •  | •      |        | Software R           |
| Salas Esparza & Herrera Sosa, 2017 | Mexico      | Bwk     | Park                 | Group            | Mixed             | •                     |   | • | Descriptive   | •               |    |        |                        |   |   |   | Air temperature    |        | •  |        |        | N/A                  |
| Salata et al., 2017                | Italy       | Csa     | Educational facility | Group            | Mixed             | •                     |   | • | Experimental  | •               | •  |        |                        |   | • |   | Comfort            | •      | •  | •      | •      | ENVI-met ©           |

| Author, Year               | Country     | Climate | Site Classification  | Vegetation Scene | Arrangements Type | Vegetation Parameters |   |   | Research Data | Analysis Method |    |        | Experimental Variables |   |   |   | Research Scope      | Season |    |        |        | Software      |
|----------------------------|-------------|---------|----------------------|------------------|-------------------|-----------------------|---|---|---------------|-----------------|----|--------|------------------------|---|---|---|---------------------|--------|----|--------|--------|---------------|
|                            |             |         |                      |                  |                   | P                     | B | S |               | M<br>s          | Si | M<br>o | P                      | B | S | C |                     | Sp     | Su | A<br>u | W<br>i |               |
| Zhao T. F. & Fong, 2017    | China       | Cwa     | Educational facility | Group            | Mixed             |                       |   | • | Descriptive   | •               | •  |        |                        |   |   |   | Comfort             |        | •  |        |        | ENVI-met ©    |
| Afshar et al., 2018        | Iran        | BSk     | Park                 | Group            | Dense             | •                     | • | • | Experimental  | •               | •  |        |                        | • |   | • | Comfort             |        |    |        | •      | ENVI-met ©    |
| Amani-Beni et al., 2018    | China       | Dwa     | Park                 | Group            | Mixed             |                       |   | • | Descriptive   | •               |    |        |                        |   |   |   | Air temperature     |        | •  |        |        | SPSS software |
| Cheung & Jim, 2018         | China       | Cwa     | Park                 | Group            | Mixed             |                       |   | • | Descriptive   | •               |    |        |                        |   |   |   | Comfort             |        | •  |        |        | Rayman        |
| Herath et al., 2018        | Sri Lanka   | Af      | Street               | Group            | Scattered         | •                     |   | • | Experimental  |                 | •  |        |                        |   | • |   | Air temperature     |        | •  |        |        | ENVI-met ©    |
| Hsieh et al., 2018         | China       | Cfa     | Educational facility | Group            | Dense             | •                     | • | • | Experimental  |                 | •  |        | •                      | • | • |   | Surface temperature |        | •  |        |        | Energy Plus   |
| Irmak et al., 2018         | Turkey      | Dsb     | Park                 | Unit             | Individual        | •                     | • |   | Descriptive   | •               |    |        |                        |   |   |   | Air temperature     |        | •  |        |        | Rayman        |
| Liu et al., 2018           | China       | Cfa     | Park                 | Unit             | Individual        | •                     | • |   | Descriptive   | •               | •  |        |                        |   |   |   | Air temperature     | •      | •  |        |        | ENVI-met ©    |
| Matsaba et al., 2018       | Kenya       | Cwb     | Park                 | Unit             | Individual        | •                     |   |   | Descriptive   | •               |    |        |                        |   |   |   | Comfort             |        | •  |        |        | N/A           |
| Stocco & Correa, 2018      | Argentina   | Bwk     | Park                 | Group            | Mixed             |                       |   | • | Experimental  | •               | •  |        |                        |   | • | • | Air temperature     |        | •  |        |        | ENVI-met ©    |
| Yilmaz et al., 2018        | Turkey      | Dfb     | Urban & Rural Area   | Group            | Scattered         | •                     | • | • | Experimental  | •               | •  |        |                        | • | • |   | Air temperature     |        | •  |        | •      | ENVI-met ©    |
| Zhao Q. et al., 2018       | USA         | Bwh     | Building             | Mixed            | Mixed             |                       |   | • | Experimental  | •               |    |        |                        |   | • |   | Surface temperature |        | •  |        |        | N/A           |
| Ahmadi V. et al., 2019     | Iran        | BWk     | Street               | Group            | Mixed             | •                     |   | • | Experimental  | •               | •  |        |                        |   | • |   | Comfort             |        | •  |        |        | ENVI-met ©    |
| Ali & Patnaik, 2019        | India       | Csa     | Park                 | Group            | Dense             | •                     |   | • | Descriptive   | •               |    |        |                        |   |   |   | Air temperature     |        | •  |        |        | ArcGIS ©      |
| Chen X. et al., 2019       | China       | Cfa     | Park                 | Group            | Dense             | •                     | • |   | Descriptive   | •               |    |        |                        |   |   |   | Air temperature     | •      | •  | •      | •      | SPSS software |
| Cheung & Jim, 2019         | China       | Cwa     | Park                 | Group            | Mixed             | •                     |   | • | Descriptive   | •               |    |        |                        |   |   |   | Air temperature     |        | •  |        |        | Rayman        |
| Colter et al., 2019        | USA         | Bwh     | Park                 | Unit             | N/A               | •                     |   |   | Descriptive   | •               | •  |        |                        |   |   |   | Comfort             |        | •  |        |        | Rayman        |
| Farhadi et al., 2019       | Iran        | Csa     | Street               | Group            | Mixed             |                       |   | • | Experimental  | •               | •  |        |                        |   | • |   | Comfort             |        | •  |        |        | ENVI-met ©    |
| Li & Song, 2019            | South Korea | Dwa     | Park                 | Group            | Dense             | •                     |   |   | Experimental  | •               | •  |        | •                      | • | • |   | Comfort             |        | •  |        |        | ENVI-met ©    |
| Moser-Reischl et al., 2019 | Germany     | Cfb     | Street               | Unit             | Aligned           | •                     | • |   | Descriptive   | •               |    |        |                        |   |   |   | Others              |        | •  | •      |        | N/A           |
| Ow et al., 2019            | Singapore   | Af      | Street               | Unit             | Aligned           | •                     | • |   | Experimental  | •               |    |        |                        |   |   | • | Evapotranspiration  | •      | •  | •      | •      | N/A           |
| Rahman et al., 2019        | Germany     | Cfb     | Street               | Group            | Aligned           | •                     | • |   | Descriptive   | •               |    |        |                        |   |   |   | Surface temperature |        | •  |        |        | Software R    |
| Rana & Ferrara, 2019       | Italy       | Cfa     | Park                 | Group            | N/A               | •                     | • |   | Descriptive   | •               |    | •      |                        |   |   |   | Evapotranspiration  | •      | •  |        |        | N/A           |
| Rui et al., 2019           | China       | Cfa     | Park                 | Group            | Mixed             | •                     |   | • | Experimental  | •               | •  |        |                        |   | • |   | Comfort             |        | •  |        |        | ENVI-met ©    |
| Spangenberg et al., 2019   | Brazil      | Cfa     | Park                 | Group            | Aligned           | •                     |   |   | Experimental  | •               | •  |        | •                      |   |   |   | Air temperature     |        | •  |        |        | ENVI-met ©    |
| Abdi et al., 2020          | Iran        | BSk     | Educational facility | Group            | Mixed             |                       | • | • | Experimental  | •               | •  |        |                        | • | • |   | Comfort             |        |    | •      |        | ENVI-met ©    |
| Cheung et al., 2020        | China       | Cwa     | Urban Forest         | Group            | Mixed             | •                     |   |   | Descriptive   | •               |    |        |                        |   |   |   | Comfort             | •      | •  | •      | •      | N/A           |
| Lee et al., 2020           | Germany     | Dfb     | Street               | Group            | Aligned           | •                     |   | • | Experimental  |                 | •  |        | •                      |   | • |   | Comfort             |        | •  |        |        | ENVI-met ©    |
| Rana et al., 2020          | Italy       | Cfa     | Park                 | Group            | Clustered         | •                     | • |   | Descriptive   | •               |    | •      |                        |   |   |   | Evapotranspiration  | •      | •  | •      | •      | N/A           |
| Speak et al., 2020         | Italy       | Cfb     | N/A                  | Unit             | Individual        | •                     |   |   | Descriptive   | •               |    |        |                        |   |   |   | Surface temperature |        | •  |        |        | Software R    |
| Tan P. Y. et al., 2020     | Singapore   | Af      | Park                 | Mixed            | Aligned           | •                     | • |   | Descriptive   | •               |    |        |                        |   |   |   | Evapotranspiration  | •      | •  | •      | •      | N/A           |
| Zheng S. et al., 2020      | China       | Cfa     | Parking lot          | Unit             | Individual        | •                     |   |   | Descriptive   |                 |    | •      |                        |   |   |   | Energy              | •      | •  |        |        | Fluent        |
| Sodoudi et al., 2018       | Germany     | Cfb     | Park                 | Group            | Mixed             | •                     |   | • | Experimental  |                 | •  |        |                        | • | • |   | Comfort             |        | •  |        |        | ENVI-met ©    |

| Author, Year              | Country     | Climate | Site Classification  | Vegetation Scene | Arrangements Type | Vegetation Parameters |   |   | Research Data | Analysis Method |    |    | Experimental Variables |   |   |   | Research Scope  | Season |    |    |    | Software                                    |
|---------------------------|-------------|---------|----------------------|------------------|-------------------|-----------------------|---|---|---------------|-----------------|----|----|------------------------|---|---|---|-----------------|--------|----|----|----|---------------------------------------------|
|                           |             |         |                      |                  |                   | P                     | B | S |               | Ms              | Si | Mo | P                      | B | S | C |                 | Sp     | Su | Au | Wi |                                             |
| Wei, J. et al., 2021      | China       | Cfa     | Park                 | Unit             | N/A               | •                     |   |   | Descriptive   | •               |    |    |                        |   |   |   | Air temperature |        | •  |    |    | Photoshop                                   |
| Li, Y. et al., 2021       | China       | Dwa     | Park                 | Mixed            | N/A               | •                     | • | • | Descriptive   | •               |    |    |                        |   |   |   | Air temperature |        | •  |    | •  | Rayman, ArcGIS ©                            |
| Gachkar, D. et al., 2021  | Iran        | Csa     | Park                 | Group            | N/A               | •                     | • |   | Experimental  | •               | •  |    | •                      | • | • |   | Air temperature |        | •  |    | •  | ENVI-met ©, Rayman                          |
| Darvish, A. et al., 2021  | Iran        | Csa     | Educational facility | Group            | N/A               | •                     | • |   | Experimental  | •               | •  |    |                        |   | • |   | Comfort         |        | •  |    | •  | ENVI-met ©, Rayman, DesignBuilder           |
| Chen, T. et al., 2021     | China       | Cfa     | Street               | Group            | Aligned           | •                     | • |   | Descriptive   | •               |    |    |                        | • | • |   | Air temperature |        |    | •  |    | N/A                                         |
| Bochenek, A. et al., 2021 | Poland      | Cfb     | Street               | Group            | Aligned           |                       |   | • | Experimental  |                 | •  |    |                        |   | • |   | Air temperature |        | •  |    |    | ENVI-met ©                                  |
| Zhang, T. et al., 2022    | China       | Cfa     | N/A                  | Unit             | Aligned           | •                     |   | • | Experimental  |                 | •  | •  |                        |   | • |   | Others          |        | •  |    |    | ENVI-met ©                                  |
| Yang, J. et al., 2022     | China       | Cfa     | Educational facility | Group            | Mixed             | •                     |   |   | Experimental  |                 | •  | •  |                        | • | • |   | Comfort         |        | •  |    | •  | ENVI-met ©                                  |
| Xiao, J. et al., 2022     | Japan       | Cfa     | Square               | Group            | Mixed             | •                     | • | • | Experimental  | •               | •  |    |                        |   | • |   | Comfort         |        | •  |    | •  | ENVI-met ©                                  |
| Kianmehr, A. et al., 2022 | USA         | Dfa     | Street               | Group            | Mixed             |                       | • | • | Experimental  | •               | •  |    |                        | • | • |   | Comfort         |        | •  |    |    | ENVI-met ©                                  |
| Fu, J. et al., 2022       | China       | Cfa     | Park                 | Group            | Mixed             |                       |   | • | Descriptive   | •               |    | •  |                        |   |   |   | Air temperature |        | •  |    |    | Rayman, SPSS software                       |
| Erell, E. et al., 2022    | Israel      | Csa     | Street               | Group            | N/A               |                       |   | • | Descriptive   | •               |    | •  |                        |   |   | • | Energy          |        | •  |    |    | Energy Plus, ArcGIS ©, Software R           |
| Zhang, J. et al., 2023    | Australia   | Cfa     | Educational facility | Unit             | Individual        | •                     |   |   | Descriptive   | •               |    |    |                        |   |   |   | Others          |        |    |    |    | N/A                                         |
| Wang, H. et al., 2023     | China       | Cfa     | Private Garden       | Group            | Mixed             | •                     |   | • | Experimental  | •               | •  |    | •                      |   | • |   | Air temperature |        | •  |    |    | ENVI-met ©, SPSS software, Cyclone software |
| Ouyang, W. et al., 2023   | China       | Cwa     | Street               | Group            | Mixed             | •                     |   | • | Experimental  | •               | •  |    | •                      |   | • |   | Air temperature |        |    |    |    | ENVI-met ©                                  |
| Ornelas, A. et al., 2023  | Portugal    | Csb     | Educational facility | Group            | Mixed             |                       |   | • | Descriptive   | •               | •  | •  |                        |   |   |   | Air temperature |        | •  |    | •  | N/A                                         |
| Lee, H. et al., 2023      | South Korea | Cfa     | Street               | Group            | Aligned           |                       | • | • | Experimental  | •               | •  |    |                        | • | • |   | Air temperature |        | •  |    |    | ENVI-met ©                                  |
| Lai, D. et al., 2023      | China       | Cfa     | Urban Forest         | Group            | Mixed             | •                     |   | • | Experimental  | •               | •  |    |                        |   | • |   | Comfort         |        | •  |    |    | ENVI-met ©                                  |
| Deng, W. et al., 2023     | China       | Cfa     | Educational facility | Unit             | Individual        | •                     | • |   | Descriptive   | •               |    |    |                        |   |   |   | Comfort         |        |    |    | •  | N/A                                         |

**Nomenclature: Climate (Köppen-Geiger):** Af (Tropical rainforest climate); Am (Tropical monsoon climate); Aw (Tropical savanna climate with dry winter); As (Tropical Savanna climate with dry summer); BWh (Hot desert climate); BWk (Cold desert climate); BSh (Hot semi-arid climate); BSk (Cold semi-arid climate); Csa (Hot-summer mediterranean climate); Csb (Warm-summer mediterranean climate); Cfa (Humid subtropical climate); Cfb (Oceanic climate); Cwb (Dry winter subtropical); Dfa (Hot summer humid continental climate); Dfb (Warm-summer humid continental climate); Dwa (Monsoon-influenced hot-summer humid continental climate). **Vegetation Parameters:** P (Physical); B (Biological); S (Spatial) . **Analysis Method:** Ms (Mathematical and Statistical Method); Si (Simulation); Mo (Modelling). **Experimental Variables:** P (Physical); B (Biological); S (Spatial); C (Context). **Season:** Sp (Spring); Su (Summer); Au (Autumn); Wi (Winter).

**Table S2.** Summary database of neighborhood scale

| Author, Year                   | Country    | Climate | Site Classification  | Vegetation Scene | Arrangements Type | Vegetation Parameters |   |   | Research Data | Analysis Method |    |                | Experimental Variables |   |   |   | Research Scope      | Season |    |                |                | Software         |
|--------------------------------|------------|---------|----------------------|------------------|-------------------|-----------------------|---|---|---------------|-----------------|----|----------------|------------------------|---|---|---|---------------------|--------|----|----------------|----------------|------------------|
|                                |            |         |                      |                  |                   | P                     | B | S |               | M <sub>s</sub>  | Si | M <sub>o</sub> | P                      | B | S | C |                     | Sp     | Su | A <sub>u</sub> | W <sub>i</sub> |                  |
| Georgi J. N. & Dimitriou, 2010 | Greece     | Csa     | Neighborhood         | Mixed            | Mixed             | •                     | • |   | Descriptive   | •               |    |                |                        |   |   |   | Comfort             |        | •  |                |                | Microsoft® Excel |
| Hamada & Ohta, 2010            | Japan      | Cfa     | Neighborhood         | Group            | Mixed             | •                     | • | • | Descriptive   | •               |    |                |                        |   |   |   | Air temperature     | •      | •  | •              | •              | N/A              |
| Onishi et al., 2010            | Japan      | Cfa     | Parking lot          | Group            | Dense             |                       |   | • | Descriptive   | •               |    | •              |                        |   |   |   | Surface temperature | •      | •  | •              | •              | ERDAS IMAGINE    |
| Peters & McFadden, 2010        | USA        | Dfa     | Neighborhood         | Group            | Mixed             | •                     | • | • | Descriptive   | •               |    |                |                        |   |   |   | Surface temperature | •      | •  | •              |                | N/A              |
| Huang H. Y. et al., 2011       | Taiwan     | Cfa     | Neighborhood         | Group            | N/A               |                       |   | • | Experimental  | •               |    |                |                        |   | • |   | Mixed               |        | •  |                |                | N/A              |
| Oliveira et al., 2011          | Portugal   | Csa     | Park                 | Group            | Mixed             | •                     | • | • | Descriptive   | •               |    |                |                        |   |   |   | Air temperature     |        | •  |                |                | Rayman           |
| Yang et al., 2011              | China      | Cfa     | Neighborhood         | Group            | Mixed             | •                     |   | • | Descriptive   | •               | •  |                |                        |   |   |   | Comfort             |        | •  |                |                | ENVI-met ©       |
| Chen X. et al., 2012           | China      | Cfa     | Neighborhood         | Group            | Mixed             |                       | • | • | Descriptive   | •               |    | •              |                        |   |   |   | Others              |        | •  | •              |                | N/A              |
| Langer et al., 2012            | Iran       | Csa     | Neighborhood         | Group            | Mixed             |                       |   | • | Experimental  | •               | •  |                |                        |   | • |   | Surface temperature | •      | •  | •              | •              | ENVI-met ©       |
| Meier & Scherer, 2012          | Germany    | Cfb     | Neighborhood         | Unit             | Dense             | •                     | • | • | Descriptive   | •               |    | •              |                        |   |   |   | Air temperature     |        | •  |                |                | N/A              |
| Ng et al., 2012                | China      | Cwa     | Neighborhood         | Group            | N/A               | •                     |   | • | Experimental  | •               | •  |                |                        |   | • | • | Air temperature     |        | •  |                |                | ENVI-met ©       |
| Shahidan et al., 2012          | Malaysia   | Af      | Neighborhood         | Group            | Clustered         | •                     |   | • | Experimental  | •               | •  |                |                        |   | • |   | Air temperature     |        |    |                | •              | ENVI-met ©       |
| Bilgili et al., 2013           | Turkey     | Csb     | Neighborhood         | Group            | Mixed             |                       |   | • | Descriptive   | •               |    |                |                        |   |   |   | Air temperature     |        |    |                |                | ArcGIS ©         |
| Chen L. & Ng, 2013             | China      | Cwa     | Neighborhood         | Group            | Mixed             | •                     |   | • | Experimental  |                 | •  |                |                        |   | • |   | Air temperature     |        | •  |                |                | ENVI-met ©       |
| Declet-Barreto et al., 2013    | USA        | Bwh     | Neighborhood         | Group            | Mixed             | •                     | • | • | Experimental  | •               | •  |                |                        |   | • |   | Air temperature     |        | •  |                |                | ENVI-met ©       |
| Hamada et al., 2013            | Japan      | Cfa     | Park                 | Group            | Mixed             |                       | • | • | Descriptive   |                 |    | •              |                        |   |   |   | Surface temperature |        | •  |                |                | N/A              |
| Srivanit & Hokao, 2013         | Japan      | Cfa     | Educational facility | Group            | Mixed             | •                     |   | • | Experimental  | •               | •  |                |                        |   | • |   | Air temperature     |        | •  |                |                | ENVI-met ©       |
| Chang & Li, 2014               | Taiwan     | Cfa     | Neighborhood         | Group            | Mixed             |                       |   | • | Descriptive   | •               |    |                |                        |   |   |   | Others              |        | •  |                | •              | S-Plus           |
| Doick et al., 2014             | UK         | Cfb     | Neighborhood         | Group            | Mixed             |                       |   | • | Descriptive   | •               |    |                |                        |   |   |   | Air temperature     |        |    | •              | •              | N/A              |
| Müller et al., 2014            | Germany    | Cfb     | Neighborhood         | Group            | Mixed             |                       |   | • | Experimental  | •               | •  |                |                        | • |   | • | Comfort             | •      | •  | •              | •              | ENVI-met ©       |
| Perini & Magliocco, 2014       | Italy      | Cfb     | Neighborhood         | Group            | Mixed             | •                     |   | • | Experimental  | •               | •  |                |                        |   | • |   | Comfort             |        | •  |                |                | ENVI-met ©       |
| Skelhorn et al., 2014          | UK         | Dfb     | Neighborhood         | Group            | Clustered         | •                     | • | • | Experimental  | •               | •  |                |                        | • | • | • | Surface temperature |        | •  |                |                | ENVI-met ©       |
| Skoulika et al., 2014          | Greece     | Csa     | Park                 | Group            | N/A               |                       |   | • | Descriptive   | •               |    | •              |                        |   |   |   | Air temperature     |        | •  |                |                | N/A              |
| Sodoudi et al., 2014           | Iran       | Csa     | Neighborhood         | Group            | Mixed             |                       |   | • | Experimental  | •               | •  |                |                        |   | • |   | Air temperature     |        | •  |                |                | ENVI-met ©       |
| Tariq & Arch, 2014             | Bangladesh | Aw      | Neighborhood         | Group            | N/A               |                       |   | • | Experimental  | •               | •  |                |                        |   | • |   | Mixed               |        | •  |                |                | ENVI-met ©       |
| Yahia & Johansson, 2014        | Syria      | BSk     | Street               | Group            | Aligned           | •                     |   | • | Experimental  | •               | •  |                |                        |   | • |   | Comfort             |        | •  |                | •              | ENVI-met ©       |
| Yan H. et al., 2014            | China      | Dwa     | Neighborhood         | Group            | N/A               |                       |   | • | Descriptive   | •               |    |                |                        |   |   |   | Air temperature     |        | •  |                | •              | Rayman           |
| Cheng X. et al., 2015          | China      | Cfa     | Neighborhood         | Group            | Mixed             |                       |   | • | Descriptive   | •               |    | •              |                        |   |   |   | Surface temperature |        | •  |                |                | ArcGIS ©         |
| Colunga et al., 2015           | Mexico     | BSh     | Neighborhood         | Group            | Scattered         | •                     |   | • | Descriptive   | •               |    |                |                        |   |   |   | Air temperature     | •      | •  | •              | •              | N/A              |
| Duarte et al., 2015            | Brazil     | Cfa     | Neighborhood         | Group            | Mixed             | •                     |   |   | Experimental  | •               | •  |                |                        |   | • |   | Air temperature     |        | •  |                |                | ENVI-met ©       |
| Ellis et al., 2015             | USA        | Cfa     | Neighborhood         | Group            | Mixed             |                       |   | • | Descriptive   | •               |    |                |                        |   |   |   | Air temperature     |        | •  |                |                | N/A              |
| Emmanuel & Loconsole, 2015     | UK         | Cfb     | Neighborhood         | Group            | Mixed             |                       |   | • | Experimental  | •               | •  |                |                        |   | • |   | Mixed               |        | •  |                |                | ENVI-met ©       |
| Lin W. et al., 2015            | China      | Dwa     | Park                 | Group            | Mixed             |                       |   | • | Descriptive   | •               |    | •              |                        |   |   |   | Air temperature     |        |    | •              |                | N/A              |
| O'Malley et al., 2015          | UK         | Cfb     | Square               | Group            | Mixed             |                       |   | • | Experimental  | •               | •  |                |                        | • |   | • | Mixed               |        |    |                |                | ENVI-met ©       |

| Author, Year                | Country     | Climate | Site Classification | Vegetation Scene | Arrangements Type | Vegetation Parameters |   |   | Research Data | Analysis Method |    |        | Experimental Variables |   |   |   | Research Scope      | Season |    |        |        | Software      |
|-----------------------------|-------------|---------|---------------------|------------------|-------------------|-----------------------|---|---|---------------|-----------------|----|--------|------------------------|---|---|---|---------------------|--------|----|--------|--------|---------------|
|                             |             |         |                     |                  |                   | P                     | B | S |               | M<br>s          | Si | M<br>o | P                      | B | S | C |                     | Sp     | Su | A<br>u | W<br>i |               |
| Peron et al., 2015          | Italy       | Cfb     | Neighborhood        | Group            | Clustered         | •                     | • | • | Experimental  | •               | •  |        |                        |   | • | • | Air temperature     |        | •  |        |        | ENVI-met ©    |
| Ballinas & Barradas, 2016   | Mexico      | Cwb     | Neighborhood        | Group            | N/A               | •                     | • |   | Experimental  | •               |    |        |                        |   | • |   | Air temperature     | •      |    |        | •      | N/A           |
| Jenerette et al., 2016      | USA         | Bwh     | Neighborhood        | Group            | Mixed             |                       |   | • | Descriptive   | •               |    | •      |                        |   |   |   | Surface temperature |        | •  |        |        | Matlab        |
| Lee et al., 2016            | Germany     | Cfb     | Neighborhood        | Group            | Scattered         | •                     |   | • | Experimental  | •               | •  |        |                        |   | • | • | Air temperature     |        | •  |        |        | ENVI-met ©    |
| Martins et al., 2016        | France      | Cfb     | Neighborhood        | Group            | Mixed             |                       |   | • | Experimental  | •               | •  |        |                        |   | • |   | Comfort             |        | •  |        |        | ENVI-met ©    |
| Taleghani et al., 2016      | USA         | Csa     | Neighborhood        | Group            | Aligned           |                       |   | • | Experimental  | •               |    |        |                        |   | • |   | Comfort             |        | •  |        |        | ENVI-met ©    |
| Tan Z. et al., 2016         | China       | Cwa     | Neighborhood        | Unit             | Aligned           | •                     |   |   | Experimental  | •               | •  |        | •                      |   |   |   | Air temperature     |        | •  |        |        | ENVI-met ©    |
| Vaz Monteiro et al., 2016   | UK          | Cfb     | Park                | Group            | N/A               |                       |   | • | Descriptive   | •               |    |        |                        |   |   |   | Air temperature     |        | •  | •      |        | N/A           |
| Wang Y. & Akbari, 2016      | Canada      | Dfb     | Neighborhood        | Group            | Mixed             | •                     | • | • | Experimental  | •               | •  |        | •                      |   | • |   | Air temperature     |        | •  |        |        | ENVI-met ©    |
| Wang Y. et al., 2016        | Canada      | Dfa     | Neighborhood        | Group            | Aligned           |                       |   | • | Experimental  | •               | •  |        |                        |   | • | • | Comfort             |        | •  |        | •      | ENVI-met ©    |
| Alchapar et al., 2017       | Argentina   | BWk     | Neighborhood        | Group            | Mixed             | •                     |   | • | Experimental  | •               | •  |        |                        |   | • |   | Air temperature     |        | •  |        |        | ENVI-met ©    |
| Barakat et al., 2017        | Egypt       | BWh     | Neighborhood        | Group            | Mixed             |                       |   | • | Experimental  |                 | •  |        | •                      |   | • |   | Comfort             | •      | •  | •      | •      | ENVI-met ©    |
| Gaitani et al., 2017        | Greece      | Csa     | Neighborhood        | Group            | Mixed             |                       |   | • | Descriptive   | •               |    | •      |                        |   |   |   | Surface temperature |        | •  |        |        | N/A           |
| Jamei & Rajagopalan, 2017   | Australia   | Cfb     | Neighborhood        | Group            | Aligned           | •                     |   | • | Experimental  | •               | •  |        |                        |   | • |   | Comfort             |        | •  |        |        | ENVI-met ©    |
| Saito K. et al., 2017       | Malaysia    | Af      | Neighborhood        | Group            | Scattered         |                       |   | • | Experimental  |                 | •  |        |                        |   | • |   | Comfort             |        | •  |        |        | ENVI-met ©    |
| Wu & Chen, 2017             | China       | Dwa     | Neighborhood        | Group            | Mixed             |                       |   | • | Experimental  |                 | •  |        |                        |   | • |   | Air temperature     |        | •  |        |        | ENVI-met ©    |
| Alchapar et al., 2018       | Argentina   | BWk     | Neighborhood        | Group            | Mixed             | •                     |   | • | Experimental  |                 | •  |        | •                      |   | • | • | Air temperature     |        | •  |        |        | ENVI-met ©    |
| Chatzinikolaou et al., 2018 | Greece      | Csa     | Neighborhood        | Group            | Mixed             | •                     | • |   | Experimental  |                 | •  |        | •                      |   |   |   | Mixed               |        | •  |        |        | ENVI-met ©    |
| Morakinyo et al., 2018      | China       | Cwa     | Neighborhood        | Group            | Mixed             | •                     |   | • | Experimental  | •               | •  |        | •                      |   |   |   | Air temperature     |        | •  |        |        | ENVI-met ©    |
| Aboelata & Sodoudi, 2019    | Egypt       | BWh     | Neighborhood        | Group            | Aligned           |                       |   | • | Experimental  |                 | •  |        |                        |   | • |   | Air temperature     | •      | •  | •      | •      | ENVI-met ©    |
| Amani-Beni et al., 2019     | China       | Dwa     | Neighborhood        | Group            | Mixed             |                       |   | • | Descriptive   | •               |    |        |                        |   |   |   | Surface temperature |        | •  |        |        | ArcGIS ©      |
| Kim et al., 2019            | South Korea | Dwa     | Park                | Group            | Mixed             |                       |   | • | Descriptive   |                 |    | •      |                        |   |   |   | Energy              | •      | •  | •      | •      | SPSS software |
| Lobaccaro et al., 2019      | Spain       | Cfb     | Street              | Group            | Aligned           | •                     |   | • | Experimental  | •               | •  |        | •                      |   |   | • | Comfort             |        | •  |        |        | ENVI-met ©    |
| Makido et al., 2019         | USA         | Csb     | Neighborhood        | Group            | Mixed             |                       |   | • | Experimental  | •               | •  |        |                        |   | • | • | Air temperature     |        | •  |        |        | ENVI-met ©    |
| Ouyang et al., 2019         | China       | Cwa     | Neighborhood        | Group            | Aligned           | •                     |   | • | Experimental  | •               | •  |        |                        |   | • |   | Air temperature     |        | •  |        |        | ENVI-met ©    |
| Ramyar et al., 2019         | Iran        | Csa     | Neighborhood        | Group            | Aligned           |                       |   | • | Experimental  |                 | •  |        |                        |   | • |   | Air temperature     |        | •  |        |        | ENVI-met ©    |
| Srivaniit & Hokao, 2019     | Thailand    | Aw      | Neighborhood        | Group            | Mixed             | •                     |   | • | Descriptive   | •               | •  |        |                        |   |   |   | Air temperature     |        | •  |        |        | ENVI-met ©    |
| Krayenhoff et al., 2020     | Canada      | Csb     | Neighborhood        | Group            | Mixed             | •                     | • |   | Descriptive   | •               |    | •      |                        |   |   |   | Mixed               |        |    | •      |        | CFD Software  |
| Morakinyo et al., 2020      | China       | Cwa     | Street              | Group            | Aligned           | •                     |   | • | Experimental  |                 | •  |        | •                      |   |   |   | Air temperature     |        | •  | •      |        | ENVI-met ©    |
| Ouyang et al., 2020         | China       | Cwa     | Street              | Group            | Aligned           |                       |   | • | Experimental  | •               | •  |        |                        |   | • |   | Comfort             |        | •  | •      |        | ENVI-met ©    |
| Richards et al., 2020       | Singapore   | Af      | Neighborhood        | Group            | Mixed             |                       |   | • | Descriptive   |                 |    |        |                        |   |   |   | Air temperature     | •      | •  | •      | •      | N/A           |
| Wai et al., 2020            | China       | Cwa     | Street              | Unit             | Individual        | •                     |   |   | Experimental  | •               | •  |        | •                      |   |   |   | Surface temperature |        | •  |        |        | ENVI-met ©    |
| Wu, C. et al. 2021          | China       | Cfa     | Park                | Group            | Mixed             |                       |   | • | Descriptive   | •               |    | •      |                        |   |   |   | Surface temperature |        |    | •      |        | N/A           |
| Sabrin, S. et al. 2021      | USA         | Cfa     | Street              | Unit             | N/A               | •                     | • | • | Descriptive   | •               | •  |        |                        | • |   |   | Comfort             |        |    |        |        | Rayman        |

| Author, Year            | Country   | Climate | Site Classification | Vegetation Scene | Arrangements Type | Vegetation parameters |   |   | Research Data | Analysis Method |    |   | Experimental Variables |   |   |   | Research Scope  | Season |    |   |   | Software |
|-------------------------|-----------|---------|---------------------|------------------|-------------------|-----------------------|---|---|---------------|-----------------|----|---|------------------------|---|---|---|-----------------|--------|----|---|---|----------|
|                         |           |         |                     |                  |                   | P                     | B | S |               | M               | Si | M | P                      | B | S | C |                 | Sp     | Su | A | W |          |
| Meili, N.et al. 2021    | Singapore | Af      | Street              | Mixed            | N/A               | •                     |   | • | Experimental  | •               | •  |   |                        |   |   |   | Comfort         | •      | •  |   |   | N/A      |
| Cheung, P. et al. 2021  | China     | Cwa     | Park                | Group            | N/A               | •                     |   | • | Descriptive   | •               |    |   |                        |   |   |   | Air temperature |        | •  |   |   | N/A      |
| Li, Yingnan et al. 2023 | China     | Cfa     | Street              | Group            | Mixed             | •                     |   | • | Experimental  | •               | •  |   |                        |   | • |   | Comfort         |        | •  |   |   | N/A      |

**Nomenclature: Climate (Köppen-Geiger):** Af (Tropical rainforest climate); Am (Tropical monsoon climate); Aw (Tropical savanna climate with dry winter); As (Tropical Savanna climate with dry summer); BWh (Hot desert climate); BWk (Cold desert climate); BSh (Hot semi-arid e); BSk (Cold semi-arid climate); Csa (Hot-summer mediterranean climate); Csb (Warm-summer mediterranean climate); Cfa (Humid subtropical climate); Cfb (Oceanic climate); Cwb (Dry winter subtropical); Dfa (Hot summer humid continental climate); Dfb (Warm-summer humid ental climate); Dwa (Monsoon-influenced hot-summer humid continental climate). **Vegetation Parameters:** P (Physical); B (Biological); S (Spatial) . **Analysis Method:** Ms (Mathematical and Statistical Method); Si (Simulation); Mo (Modelling). **Experimental Variables:** P (Physical); B igital); S (Spatial); C (Context). **Season:** Sp (Spring); Su (Summer); Au (Autumn); Wi (Winter).

Table S3. Summary database of city scale

| Author, Year                     | Country      | Climate | Site Classification | Vegetation Scene | Arrangements Type | Vegetation parameters |   |   | Research Data | Analysis Method |    |   | Experimental Variables |   |   |   | Research Scope      | Season |    |   |   | Software            |
|----------------------------------|--------------|---------|---------------------|------------------|-------------------|-----------------------|---|---|---------------|-----------------|----|---|------------------------|---|---|---|---------------------|--------|----|---|---|---------------------|
|                                  |              |         |                     |                  |                   | P                     | B | S |               | M               | Si | M | P                      | B | S | C |                     | Sp     | Su | A | W |                     |
| Buyantuyev & Wu, 2010            | USA          | Bwh     | City                | Group            | Mixed             |                       |   | • | Descriptive   | •               |    | • |                        |   |   |   | Surface temperature |        | •  | • |   | ERDAS IMAGINE       |
| Leuzinger et al., 2010           | Switzerland  | Cfb     | Park                | Group            | Mixed             | •                     | • |   | Descriptive   | •               |    | • |                        |   |   |   | Air temperature     |        | •  |   |   | ENVI ®              |
| Zhou Y. & Shepherd, 2010         | USA          | Cfa     | City                | Group            | Mixed             |                       |   | • | Descriptive   | •               |    | • |                        |   |   |   | Surface temperature | •      | •  | • | • | N/A                 |
| Zhou W. et al., 2011             | USA          | Cfa     | City                | Group            | Mixed             |                       |   | • | Descriptive   | •               |    | • |                        |   |   |   | Surface temperature |        | •  |   |   | N/A                 |
| Choi et al., 2012                | South Korea  | Dwa     | City                | Group            | Mixed             |                       |   | • | Descriptive   | •               |    | • |                        |   |   |   | Others              |        | •  |   |   | ArcGIS ©            |
| Halper et al., 2012              | USA          | Bsh     | Urban & Rural Area  | Group            | Mixed             |                       |   | • | Descriptive   | •               |    | • |                        |   |   |   | Surface temperature |        |    |   |   | Matlab              |
| Connors et al., 2013             | USA          | Bwh     |                     | Group            | Mixed             |                       |   | • | Descriptive   | •               |    | • |                        |   |   |   | Surface temperature |        | •  |   |   | ArcGIS ©            |
| Dobrovolný, 2013                 | Czechia      | Cfb     | City                | Group            | Mixed             |                       |   | • | Descriptive   | •               |    | • |                        |   |   |   | Surface temperature |        | •  |   |   | GIS                 |
| Holmer et al., 2013              | Burkina Faso | Bsh     | Neighborhood        | Group            | Mixed             | •                     |   | • | Descriptive   | •               |    |   |                        |   |   |   | Air temperature     |        |    | • |   | N/A                 |
| Qiao et al., 2013                | China        | Dwa     | City                | Group            | Mixed             |                       |   | • | Descriptive   | •               |    |   |                        |   |   |   | Surface temperature | •      | •  | • | • | N/A                 |
| Sawka et al., 2013               | Canada       | Dfa     | Neighborhood        | Group            | N/A               | •                     | • | • | Descriptive   | •               |    |   |                        |   |   |   | Energy              | •      | •  | • | • | MICROPAS®           |
| Tan M. & Li, 2013                | China        | Dwa     | City                | Group            | Mixed             |                       |   | • | Descriptive   | •               |    | • |                        |   |   |   | Surface temperature |        | •  |   |   | ENVI-met ©          |
| Adams & Smith, 2014              | Australia    | Cfa     | Park                | Group            | Mixed             |                       |   | • | Descriptive   | •               |    |   |                        |   |   |   | Surface temperature |        |    |   |   | ArcGIS ©            |
| Black & Stephen, 2014            | USA          | Bwk     | City                | Group            | Mixed             |                       |   | • | Descriptive   | •               |    |   |                        |   |   |   | Air temperature     |        |    |   |   | N/A                 |
| Kong F. et al., 2014             | China        | Cfa     | City                | Group            | Mixed             |                       |   | • | Descriptive   | •               |    | • |                        |   |   |   | Air temperature     |        | •  |   |   | ESRI ArcMap         |
| Zheng B. et al., 2014            | USA          | Bwh     | City                | Group            | Mixed             |                       |   | • | Descriptive   | •               |    | • |                        |   |   |   | Surface temperature |        | •  |   |   | FRAGSTATS©          |
| Zhou W. et al., 2014             | USA          | Cfa     | City                | Group            | Mixed             |                       |   | • | Descriptive   | •               |    | • |                        |   |   |   | Surface temperature | •      | •  | • | • | SPSS software       |
| Alavipanah et al., 2015          | Germany      | Cfb     | City                | Group            | Mixed             |                       |   | • | Descriptive   | •               |    |   |                        |   |   |   | Surface temperature |        | •  |   |   | ESRI ArcMap         |
| Brown et al., 2015               | Malaysia     | Af      | City                | Group            | Mixed             | •                     |   |   | Experimental  | •               |    |   |                        |   |   | • | Energy              |        |    |   |   | N/A                 |
| Fan C. et al., 2015              | USA          | Bwh     | City                | Group            | Mixed             |                       |   | • | Descriptive   | •               |    | • |                        |   |   |   | Surface temperature |        | •  |   | • | eCognition          |
| Myint et al., 2015               | USA          | Bwh     | City                | Group            | Mixed             |                       |   | • | Descriptive   | •               |    |   |                        |   |   |   | Surface temperature | •      | •  | • |   | Definiens Developer |
| Rasul et al., 2015               | Irak         | Csa     | City                | Group            | Mixed             |                       |   | • | Descriptive   | •               |    | • |                        |   |   |   | Surface temperature |        | •  |   |   | ENVI ®              |
| Rotem-Mindali et al., 2015       | Israel       | Csa     | City                | Group            | Mixed             |                       |   | • | Descriptive   | •               |    | • |                        |   |   |   | Surface temperature |        | •  |   |   | ArcGIS ©            |
| Trihamdani et al., 2015          | Vietnam      | Cfa     | City                | Group            | Mixed             |                       |   | • | Experimental  | •               |    | • |                        |   | • |   | Air temperature     |        | •  |   |   | N/A                 |
| Coutts, Harris, et al., 2016     | Australia    | Cfb     | City                | Group            | Mixed             |                       |   | • | Descriptive   |                 |    | • |                        |   |   |   | Surface temperature |        | •  |   |   | ArcGIS ©            |
| Jaganmohan et al., 2016          | Germany      | Cfb     | Park                | Group            | Mixed             |                       |   | • | Descriptive   | •               |    |   |                        |   |   |   | Air temperature     |        | •  |   |   | ArcGIS ©            |
| Jeganathan et al., 2016          | India        | Aw      | City                | Group            | Mixed             |                       |   | • | Descriptive   |                 |    | • |                        |   |   |   | Air temperature     |        | •  |   |   | ArcGIS ©            |
| Tayyebi & Darrel Jenerette, 2016 | USA          | Csa     | City                | Group            | Mixed             |                       |   | • | Descriptive   | •               |    | • |                        |   |   |   | Surface temperature | •      |    |   |   | Atmospheric         |
| Žuvela-Aloise et al., 2016       | Austria      | Cfb     | Park                | Group            | Mixed             |                       |   | • | Experimental  | •               | •  |   |                        |   | • |   | Air temperature     |        | •  | • | • | N/A                 |
| Zhou W. et al., 2017             | USA          | Cfa     | City                | Group            | Mixed             |                       |   | • | Descriptive   | •               |    | • |                        |   |   |   | Surface temperature |        | •  |   |   | N/A                 |
| Ren et al., 2018                 | China        | Dwa     | Park                | Group            | Mixed             | •                     |   | • | Descriptive   | •               |    | • |                        |   |   |   | Surface temperature |        | •  | • |   | SPSS software       |
| Xie et al., 2018                 | China        | Cfa     | City                | Group            | Mixed             |                       |   | • | Descriptive   | •               |    | • |                        |   |   |   | Surface temperature |        | •  |   |   | N/A                 |
| Duncan et al., 2019              | Australia    | Csa     | Park                | Group            | Mixed             |                       |   | • | Descriptive   | •               |    | • |                        |   |   |   | Surface temperature |        | •  |   | • | N/A                 |
| Fan H. et al., 2019              | China        | Cwa     | City                | Group            | Mixed             |                       |   | • | Descriptive   | •               |    | • |                        |   |   |   | Surface temperature |        | •  |   |   | ENVI ®              |
| Masoudi & Tan, 2019              | Singapore    | Af      | Neighborhood        | Group            | Mixed             |                       |   | • | Descriptive   | •               |    | • |                        |   |   |   | Surface temperature | •      |    | • | • | ESRI ArcMap         |



| Author, Year                       | Country        | Climate | Site Classification | Vegetation Scene | Arrangements Type | Vegetation Parameters |   |   | Research Data | Analysis Method |    |    | Experimental Variables |   |   |   | Research Scope      | Season |    |    |    | Software                         |
|------------------------------------|----------------|---------|---------------------|------------------|-------------------|-----------------------|---|---|---------------|-----------------|----|----|------------------------|---|---|---|---------------------|--------|----|----|----|----------------------------------|
|                                    |                |         |                     |                  |                   | P                     | B | S |               | Ms              | Si | Mo | P                      | B | S | C |                     | Sp     | Su | Au | Wi |                                  |
| Masoudi et al., 2019               | Singapore      | Af      | Neighborhood        | Group            | Mixed             |                       |   | • | Descriptive   | •               |    | •  |                        |   |   |   | Surface temperature | •      | •  |    | •  | ESRI ArcMap                      |
| Moss et al., 2019                  | UK             | Cfb     | Urban Forest        | Group            | N/A               | •                     | • | • | Experimental  | •               | •  |    |                        |   | • |   | Energy              | •      | •  | •  | •  | TRNSYS                           |
| Pramanik & Punia, 2019             | India          | Cfa     | City                | Group            | Mixed             |                       |   | • | Descriptive   | •               |    |    |                        |   |   |   | Surface temperature | •      |    |    |    | ArcGIS ©                         |
| Wang C. et al., 2019               | USA            | Cfa     | City                | Group            | Mixed             |                       |   | • | Descriptive   | •               |    |    |                        |   |   |   | Surface temperature | •      | •  | •  | •  | N/A                              |
| Wang W. et al., 2019               | China          | Dwa     | City                | Group            | Mixed             | •                     | • |   | Descriptive   | •               |    |    |                        |   |   |   | Air temperature     |        | •  |    |    | N/A                              |
| J. Yan et al., 2019                | USA            | Bwh     | Neighborhood        | Group            | Mixed             |                       |   | • | Descriptive   | •               |    | •  |                        |   |   |   | Surface temperature |        | •  |    |    | N/A                              |
| Zhou W. et al., 2019               | China          | Cfa     | Park                | Group            | Mixed             |                       |   | • | Descriptive   | •               |    | •  |                        |   |   |   | Surface temperature |        | •  |    |    | N/A                              |
| Bartesaghi-Koc et al., 2020        | Australia      | Cfa     | City                | Group            | Mixed             |                       |   | • | Descriptive   | •               |    | •  |                        |   |   |   | Surface temperature |        | •  |    | •  | PARGE®                           |
| Chen J. et al., 2020               | China          | Cfa     | City                | Group            | Mixed             | •                     |   | • | Descriptive   | •               |    |    |                        |   |   |   | Air temperature     | •      |    |    |    | Software R                       |
| Wang J. et al., 2020               | USA            | N/A     | City                | Group            | Mixed             |                       |   | • | Descriptive   | •               |    |    |                        |   |   |   | Surface temperature |        | •  |    |    | N/A                              |
| Yu et al., 2020                    | USA            | Cfa     | City                | Group            | Mixed             |                       |   | • | Descriptive   |                 |    | •  |                        |   |   |   | Surface temperature | •      | •  |    |    | N/A                              |
| Zhu, W. et al., 2021               | China          | Cwa     | Park                | Group            | Mixed             |                       |   | • | Descriptive   | •               |    | •  |                        |   |   |   | Surface temperature |        | •  |    |    | N/A                              |
| Zhao, J. et al., 2021              | China          | Dwa     | Park                | Group            | Mixed             | •                     |   | • | Descriptive   | •               |    | •  |                        |   |   |   | Surface temperature | •      | •  | •  | •  | N/A                              |
| Sun, Y. et al., 2021               | China          | Cfa     | Park                | Group            | Mixed             |                       |   | • | Descriptive   | •               |    | •  |                        |   |   |   | Surface temperature |        | •  |    | •  | ArcGIS ©                         |
| Peng, J. et al., 2021              | China          | Cfa     | Park                | Group            | Mixed             |                       |   | • | Descriptive   | •               |    | •  |                        |   |   |   | Surface temperature |        |    |    |    | ArcGIS ©                         |
| Li, Y. et al., 2021                | China          | Dwa     | Park                | Group            | Mixed             |                       |   | • | Descriptive   | •               |    |    |                        |   |   |   | Air temperature     |        | •  |    |    | ENVI ®, ArcGIS ©                 |
| Jamali, F. et al., 2021            | Iran           | Csa     | Park                | Group            | Mixed             |                       |   | • | Descriptive   | •               |    |    |                        |   |   |   | Surface temperature | •      | •  | •  | •  | QGIS®                            |
| Gomez-Martinez, F. et al., 2021    | Mexico         | Cwb     | Park                | Group            | Mixed             |                       |   | • | Descriptive   | •               |    | •  |                        |   |   |   | Surface temperature | •      | •  | •  | •  | N/A                              |
| Ekwe, M. et al., 2021              | Nigeria        | Am      | Park                | Group            | Mixed             |                       |   | • | Descriptive   | •               |    | •  |                        |   |   |   | Surface temperature |        | •  |    |    | ArcGIS ©                         |
| Alexander, C., 2021                | Denmark        | Cfb     | City                | Group            | Mixed             | •                     |   | • | Descriptive   | •               |    | •  |                        |   |   |   | Surface temperature |        | •  |    |    | Matlab, ESRI ArcMap              |
| Zhang, J. et al., 2022             | Australia      | Cfa     | Park                | Mixto            | Mixed             | •                     |   |   | Descriptive   | •               |    |    | •                      |   |   |   | Air temperature     |        | •  |    |    | WinSCANOPY                       |
| Murtinová, V. et al., 2022         | Slovakia       | Dfb     | City                | Group            | Mixed             |                       |   | • | Descriptive   | •               |    | •  |                        |   |   |   | Surface temperature |        | •  |    |    | ArcGIS ©, Software R             |
| Li, C. et al., 2022                | Bangladesh     | Aw      | City                | Group            | Mixed             |                       |   | • | Descriptive   | •               |    |    |                        |   |   |   | Surface temperature |        |    |    | •  | N/A                              |
| Lemoine-Rodríguez, R. et al., 2022 | Mexico         | Cfb     | City                | Group            | Mixed             |                       |   | • | Descriptive   | •               |    |    |                        |   |   |   | Surface temperature | •      |    |    |    | Software R                       |
| Kowe, P. et al., 2022              | Zimbabwe       | Cwb     | Park                | Group            | Mixed             |                       |   | • | Descriptive   | •               |    | •  |                        |   |   |   | Surface temperature | •      |    |    |    | N/A                              |
| Du, C. et al., 2022                | China          | Cfa     | Park                | Group            | Mixed             |                       |   | • | Descriptive   | •               |    | •  |                        |   |   |   | Surface temperature |        | •  |    |    | N/A                              |
| Das, M. et al., 2022               | India          | Aw      | Park                | Group            | Mixed             |                       |   | • | Descriptive   | •               |    | •  |                        |   |   |   | Surface temperature | •      |    |    |    | N/A                              |
| Sharmin, M. et al., 2023           | Australia      | Cfa     | Park                | Unit             | Individual        | •                     |   |   | Descriptive   | •               |    |    |                        |   |   |   | Mixed               |        | •  |    |    | N/A                              |
| Liu, Zhixin et al., 2023           | China          | Cfa     | Park                | Group            | Mixed             |                       |   | • | Descriptive   | •               |    | •  |                        |   |   |   | Surface temperature |        | •  |    |    | Google Earth Engine, idu Map API |
| Kirschner, V. et al., 2023         | Czech Republic | Cfb     | City                | Group            | Mixed             |                       |   | • | Descriptive   | •               |    | •  |                        |   |   |   | Surface temperature |        | •  |    |    | N/A                              |
| Gallay, I. et al., 2023            | Slovakia       | Dfb     | City                | Group            | Mixed             |                       | • | • | Descriptive   | •               |    | •  |                        |   |   |   | Surface temperature |        | •  |    |    | ArcGIS ©, Software R             |
| Feng, X. et al., 2023              | China          | Cwa     | Park                | Group            | Mixed             |                       |   | • | Descriptive   | •               |    | •  |                        |   |   |   | Surface temperature |        | •  |    |    | ENVI ®                           |

**Nomenclature: Climate (Köppen-Geiger):** Af (Tropical rainforest climate); Am (Tropical monsoon climate); Aw (Tropical savanna climate with dry winter); As (Tropical Savanna climate with dry summer); BWh (Hot desert climate); BWk (Cold desert climate); BSh (Hot semi-arid climate); BSk (Cold semi-arid climate); Csa (Hot-summer mediterranean climate); Csb (Warm-summer mediterranean climate); Cfa (Humid subtropical climate); Cfb (Oceanic climate); Cwb (Dry winter subtropical); Dfa (Hot summer humid continental climate); Dfb (Warm-summer humid ntinental climate); Dwa (Monsoon-influenced hot-summer humid continental climate). **Vegetation Parameters:** P (Physical); B (Biological); S (Spatial) . **Analysis Method:** Ms (Mathematical and Statistical Method); Si (Simulation); Mo (Modelling). **Experimental Variables:** P (Physical); B iological); S (Spatial); C (Context). **Season:** Sp (Spring); Su (Summer); Au (Autumn); Wi (Winter).

## References

- Aboelata, A., Sodoudi, S., 2019. Evaluating urban vegetation scenarios to mitigate urban heat island and reduce buildings' energy in dense built-up areas in Cairo. *Build. Environ.* 166, 106407. <https://doi.org/10.1016/j.buildenv.2019.106407>
- Adams, M.P., Smith, P.L., 2014. A systematic approach to model the influence of the type and density of vegetation cover on urban heat using remote sensing. *Landsc. Urban Plan.* 132, 47–54. <https://doi.org/10.1016/j.landurbplan.2014.08.008>
- Ahmadi Venhari, A., Tenpierik, M., Taleghani, M., 2019. The role of sky view factor and urban street greenery in human thermal comfort and heat stress in a desert climate. *J. Arid Environ.* 166, 68–76. <https://doi.org/10.1016/j.jaridenv.2019.04.009>
- Akbari, H., Pomerantz, M., Taha, H., 2001. Cool surfaces and shade trees to reduce energy use and improve air quality in urban areas. *Sol. Energy* 70, 295–310. [https://doi.org/10.1016/S0038-092X\(00\)00089-X](https://doi.org/10.1016/S0038-092X(00)00089-X)
- Al-Gretawee, H., Rayburg, S., Neave, M., 2016. The cooling effect of a medium sized park on an urban environment. *Int. J. GEOMATE* 11, 2541–2546. <https://doi.org/10.21660/2016.26.5183>
- Alavipanah, S., Wegmann, M., Qureshi, S., Weng, Q., Koellner, T., 2015. The Role of Vegetation in Mitigating Urban Land Surface Temperatures: A Case Study of Munich, Germany during the Warm Season. *Sustainability* 7, 4689–4706. <https://doi.org/10.3390/su7044689>
- Amani-Beni, M., Zhang, B., Xie, G. Di, Shi, Y., 2019. Impacts of urban green landscape patterns on land surface temperature: Evidence from the adjacent area of Olympic Forest Park of Beijing, China. *Sustainability* 11. <https://doi.org/10.3390/su11020513>
- Amani-Beni, M., Zhang, B., Xie, G. di, Xu, J., 2018. Impact of urban park's tree, grass and waterbody on microclimate in hot summer days: A case study of Olympic Park in Beijing, China. *Urban For. Urban Green.* 32, 1–6. <https://doi.org/10.1016/j.ufug.2018.03.016>
- Aram, F., Higuera García, E., Solgi, E., Mansournia, S., 2019. Urban green space cooling effect in cities. *Heliyon* 5, 1–31. <https://doi.org/10.1016/j.heliyon.2019.e01339>
- Armson, D., Stringer, P., Ennos, A.R., 2012. The effect of tree shade and grass on surface and globe temperatures in an urban area. *Urban For. Urban Green.* 11, 245–255. <https://doi.org/10.1016/j.ufug.2012.05.002>
- Asikin, D., Nugroho, A.M., Hasyim, A.W., 2014. An Evaluation Building Passive Cooling Achieved through Modification of Herbal Garden Configuration. 1st ICETIA Proc. 9–13.
- Balany, F., Ng, A.W.M., Muttill, N., Muthukumaran, S., Wong, M.S., 2020. Green infrastructure as an urban heat island mitigation strategy—a review. *Water (Switzerland)* 12, 1–22. <https://doi.org/10.3390/w12123577>
- Ballinas, M., Barradas, V.L., 2016. The Urban Tree as a Tool to Mitigate the Urban Heat Island in Mexico City: A Simple Phenomenological Model. *J. Environ. Qual.* 45, 157–166. <https://doi.org/10.2134/jeq2015.01.0056>
- Bartasaghi-Koc, C., Osmond, P., Peters, A., 2020. Quantifying the seasonal cooling capacity of 'green infrastructure types' (GITs): An approach to assess and mitigate surface urban heat island in Sydney, Australia. *Landsc. Urban Plan.* 203, 103893. <https://doi.org/10.1016/j.landurbplan.2020.103893>
- Bartasaghi Koc, C., Osmond, P., Peters, A., 2018. Evaluating the cooling effects of green infrastructure: A systematic review of methods, indicators and data sources. *Sol. Energy* 166, 486–508. <https://doi.org/10.1016/j.solener.2018.03.008>
- Bartasaghi Koc, C., Osmond, P., Peters, A., 2017. Towards a comprehensive green infrastructure typology: a systematic review of approaches, methods and typologies. *Urban Ecosyst.* 20, 15–35. <https://doi.org/10.1007/s11252-016-0578-5>
- Bazant S., J., 2010. Expansión urbana incontrolada y paradigmas de la planeación urbana. *Espac. Abierto* 19, 475–503.
- Bencheikh, H., Rchid, A., 2012. The effects of green spaces (palme trees) on the microclimate in arides zones, case study: Ghardaia , Algeria. *Energy Procedia* 18, 10–20. <https://doi.org/10.1016/j.egypro.2012.05.013>
- Block, A.H., Livesley, S.J., Williams, N.S.G., 2012. Responding to the Urban Heat Island : A Review of the Potential of Green Infrastructure, Victorian Centre for Climate Change Adaptation.
- Bowler, D.E., Buyung-Ali, L., Knight, T.M., Pullin, A.S., 2010. Urban greening to cool towns and cities: A systematic review of the empirical evidence. *Landsc. Urban Plan.* 97, 147–155. <https://doi.org/10.1016/j.landurbplan.2010.05.006>
- Bréda, N.J.J., 2008. Leaf Area Index. *Encycl. Ecol.* 2148–2154. <https://doi.org/10.1016/B978-008045405-4.00849-1>
- Brown, R.D., Vanos, J., Kenny, N., Lenzholzer, S., 2015. Designing urban parks that ameliorate the effects of climate change. *Landsc. Urban Plan.* 138, 118–131. <https://doi.org/10.1016/j.landurbplan.2015.02.006>
- Bruse, D., Bruse, M., 2017. Decoding Urban Nature Envi-Met 25.

- Buyantuyev, A., Wu, J., 2010. Urban heat islands and landscape heterogeneity: Linking spatiotemporal variations in surface temperatures to land-cover and socioeconomic patterns. *Landsc. Ecol.* 25, 17–33. <https://doi.org/10.1007/s10980-009-9402-4>
- Cadenasso, M.L., Pickett, S.T.A., Schwarz, K., 2007. Spatial heterogeneity in urban ecosystems: Reconceptualizing land cover and a framework for classification. *Front. Ecol. Environ.* 5, 80–88. [https://doi.org/10.1890/1540-9295\(2007\)5\[80:SHIUER\]2.0.CO;2](https://doi.org/10.1890/1540-9295(2007)5[80:SHIUER]2.0.CO;2)
- Calcerano, F., Martinelli, L., 2016. Numerical optimisation through dynamic simulation of the position of trees around a stand-alone building to reduce cooling energy consumption. *Energy Build.* 112, 234–243. <https://doi.org/10.1016/j.enbuild.2015.12.023>
- Chang, C.R., Li, M.H., 2014. Effects of urban parks on the local urban thermal environment. *Urban For. Urban Green.* 13, 672–681. <https://doi.org/10.1016/j.ufug.2014.08.001>
- Chaolin, G., 2020. Urbanization, in: *International Encyclopedia of Human Geography*. pp. 141–153. <https://doi.org/10.1016/b978-0-08-102295-5.10355-5>
- Chatzidimitriou, A., Yannas, S., 2015. Microclimate development in open urban spaces: The influence of form and materials. *Energy Build.* 108, 156–174. <https://doi.org/10.1016/j.enbuild.2015.08.048>
- Chatzinikolaou, E., Chalkias, C., Dimopoulou, E., 2018. Urban microclimate improvement using ENVI-MET climate model. *Int. Arch. Photogramm. Remote Sens. Spat. Inf. Sci.* 42, 69–76. <https://doi.org/10.5194/isprs-archives-XLII-4-69-2018>
- Chen, J., Jin, S., Du, P., 2020. Roles of horizontal and vertical tree canopy structure in mitigating daytime and nighttime urban heat island effects. *Int. J. Appl. Earth Obs. Geoinf.* 89, 102060. <https://doi.org/10.1016/j.jag.2020.102060>
- Cheung, P.K., Jim, C.Y., 2019. Differential cooling effects of landscape parameters in humid-subtropical urban parks. *Landsc. Urban Plan.* 192. <https://doi.org/10.1016/j.landurbplan.2019.103651>
- Choi, C., Berry, P., Smith, A., 2021. The climate benefits, co-benefits, and trade-offs of green infrastructure: A systematic literature review. *J. Environ. Manage.* 291, 112583. <https://doi.org/10.1016/j.jenvman.2021.112583>
- Cohen, P., Potchter, O., Matzarakis, A., 2012. Daily and seasonal climatic conditions of green urban open spaces in the Mediterranean climate and their impact on human comfort. *Build. Environ.* 51, 285–295. <https://doi.org/10.1016/j.buildenv.2011.11.020>
- Devitofrancesco, A., Ghellere, M., Meroni, I., Modica, M., Paleari, S., Zoboli, R., 2016. Sustainability assessment of urban areas through a multicriteria decision support system. *CESB 2016 - Cent. Eur. Towar. Sustain. Build.* 2016 Innov. Sustain. Futur. 499–506.
- Duncan, J.M.A., Boruff, B., Saunders, A., Sun, Q., Hurley, J., Amati, M., 2019. Turning down the heat: An enhanced understanding of the relationship between urban vegetation and surface temperature at the city scale. *Sci. Total Environ.* 656, 118–128. <https://doi.org/10.1016/j.scitotenv.2018.11.223>
- El-Bardisy, W.M., Fahmy, M., El-Gohary, G.F., 2016. Climatic Sensitive Landscape Design: Towards a Better Microclimate through Plantation in Public Schools, Cairo, Egypt. *Procedia - Soc. Behav. Sci.* 216, 206–216. <https://doi.org/10.1016/j.sbspro.2015.12.029>
- Endreny, T.A., 2018. Strategically growing the urban forest will improve our world. *Nat. Commun.* 9, 10–12. <https://doi.org/10.1038/s41467-018-03622-0>
- Enete, I., Alabi, M., Chukwudelanzu, V., 2012. Tree canopy cover variation effects on urban heat island in Enugu city, Nigeria. *Dev. Ctry. Stud.* 2, 12–19.
- Fan, C., Myint, S.W., Zheng, B., 2015. Measuring the spatial arrangement of urban vegetation and its impacts on seasonal surface temperatures. *Prog. Phys. Geogr.* 39, 199–219. <https://doi.org/10.1177/0309133314567583>
- Farhadi, H., Faizi, M., Sanaieian, H., 2019. Mitigating the urban heat island in a residential area in Tehran: Investigating the role of vegetation, materials, and orientation of buildings. *Sustain. Cities Soc.* 46, 101448. <https://doi.org/10.1016/j.scs.2019.101448>
- Feng, X., Yu, J., Xin, C., Ye, T., Wang, T., Chen, H., Zhang, X., Zhang, L., 2023. Quantifying and Comparing the Cooling Effects of Three Different Morphologies of Urban Parks in Chengdu. *Land* 12, 451. <https://doi.org/10.3390/land12020451>
- Gallay, I., Olah, B., Murtinová, V., Gallayová, Z., 2023. Quantification of the Cooling Effect and Cooling Distance of Urban Green Spaces Based on Their Vegetation Structure and Size as a Basis for Management Tools for Mitigating Urban Climate. *Sustainability* 15, 3705. <https://doi.org/10.3390/su15043705>
- Gomez-Martinez, F., de Beurs, K.M., Koch, J., Widener, J., 2021. Multi-Temporal Land Surface Temperature and Vegetation Greenness in Urban Green Spaces of Puebla, Mexico. *Land* 10, 155.

- <https://doi.org/10.3390/land10020155>
- Gómez-Muñoz, V.M., Porta-Gándara, M.A., Fernández, J.L., 2010. Effect of tree shades in urban planning in hot-arid climatic regions. *Landsc. Urban Plan.* 94, 149–157. <https://doi.org/10.1016/j.landurbplan.2009.09.002>
- Hamada, S., Ohta, T., 2010. Seasonal variations in the cooling effect of urban green areas on surrounding urban areas. *Urban For. Urban Green.* 9, 15–24. <https://doi.org/10.1016/j.ufug.2009.10.002>
- Herath, H.M.P.I.K., Halwatura, R.U., Jayasinghe, G.Y., 2018. Evaluation of green infrastructure effects on tropical Sri Lankan urban context as an urban heat island adaptation strategy. *Urban For. Urban Green.* 29, 212–222. <https://doi.org/10.1016/j.ufug.2017.11.013>
- Hsieh, C.M., Li, J.J., Zhang, L., Schwegler, B., 2018. Effects of tree shading and transpiration on building cooling energy use. *Energy Build.* 159, 382–397. <https://doi.org/10.1016/j.enbuild.2017.10.045>
- Huang, K.T., Li, Y.J., 2017. Impact of street canyon typology on building's peak cooling energy demand: A parametric analysis using orthogonal experiment. *Energy Build.* 154, 448–464. <https://doi.org/10.1016/j.enbuild.2017.08.054>
- Hulley, G.C., Ghent, D., Götsche, F.M., Guillevic, P.C., Mildrexler, D.J., Coll, C., 2019. Land Surface Temperature, in: *Taking the Temperature of the Earth*. pp. 57–127. <https://doi.org/10.1016/b978-0-12-814458-9.00003-4>
- Jamei, E., Rajagopalan, P., 2017. Urban development and pedestrian thermal comfort in Melbourne. *Sol. Energy* 144, 681–698. <https://doi.org/10.1016/j.solener.2017.01.023>
- Jeong, D., Park, K., Song, B., Kim, G., 2015. Validation of ENVI-met PMV values by in-situ measurements. ICUC9 - 9th Int. Conf. Urban Clim. jointly with 12th Symp. Urban Environ.
- Joshi, M.Y., Rodler, A., Musy, M., Guernouti, S., Cools, M., Teller, J., 2022. Identifying urban morphological archetypes for microclimate studies using a clustering approach. *Build. Environ.* 224, 109574. <https://doi.org/10.1016/j.buildenv.2022.109574>
- Jung, A., Kardeván, P., Tokei, L., 2005. Detection of urban effect on vegetation in a less built-up Hungarian city by hyperspectral remote sensing. *Phys. Chem. Earth* 30, 255–259. <https://doi.org/10.1016/j.pce.2004.08.041>
- Kang, J., Hirabayashi, S., Shibata, S., 2022. Urban Forest Ecosystem Services Vary with Land Use and Species: A Case Study of Kyoto City. *Forests* 13, 1–15. <https://doi.org/10.3390/f13010067>
- Kim, G., Coseo, P., 2018. Urban park systems to support sustainability: The role of urban park systems in hot arid urban climates. *Forests* 9, 1–16. <https://doi.org/10.3390/f9070439>
- Konarska, J., Lindberg, F., Larsson, A., Thorsson, S., Holmer, B., 2014. Transmissivity of solar radiation through crowns of single urban trees-application for outdoor thermal comfort modelling. *Theor. Appl. Climatol.* 117, 363–376. <https://doi.org/10.1007/s00704-013-1000-3>
- Kong, F., Sun, C., Liu, F., Yin, H., Jiang, F., Pu, Y., Cavan, G., Skelhorn, C., Middel, A., Dronova, I., 2016. Energy saving potential of fragmented green spaces due to their temperature regulating ecosystem services in the summer. *Appl. Energy* 183, 1428–1440. <https://doi.org/10.1016/j.apenergy.2016.09.070>
- Krayenhoff, E.S., Jiang, T., Christen, A., Martilli, A., Oke, T.R., Bailey, B.N., Nazarian, N., Voogt, J.A., Giometto, M.G., Stastny, A., Crawford, B.R., 2020. A multi-layer urban canopy meteorological model with trees (BEP-Tree): Street tree impacts on pedestrian-level climate. *Urban Clim.* 32, 100590. <https://doi.org/10.1016/j.uclim.2020.100590>
- Labib, S.M., Lindley, S., Huck, J.J., 2020. Spatial dimensions of the influence of urban green-blue spaces on human health: A systematic review. *Environ. Res.* 180, 108869. <https://doi.org/10.1016/j.envres.2019.108869>
- LaGro, J., 2005. Land-Use Classification. *Encycl. Soils Environ.*
- Lai, D., Liu, W., Gan, T., Liu, K., Chen, Q., 2019. A review of mitigating strategies to improve the thermal environment and thermal comfort in urban outdoor spaces. *Sci. Total Environ.* 661, 337–353. <https://doi.org/10.1016/j.scitotenv.2019.01.062>
- Lechner, N., 2014. Sustainable cities are solar-responsive cities, in: Lehmann, S. (Ed.), *Low Carbon Cities: Transforming Urban Systems*. Routledge, p. 484.
- Lee, H., Lim, H., Park, S., 2023. Quantitative assessment of green coverage changes under the human-biometeorological perspective: A simulation case study in Jeju, Republic of Korea. *Sustain. Cities Soc.* 97, 104734. <https://doi.org/10.1016/j.scs.2023.104734>
- Lee, H., Mayer, H., Chen, L., 2016. Contribution of trees and grasslands to the mitigation of human heat stress in a residential district of Freiburg, Southwest Germany. *Landsc. Urban Plan.* 148, 37–50. <https://doi.org/10.1016/j.landurbplan.2015.12.004>
- Li, Y., Song, Y., 2019. Optimization of vegetation arrangement to improve microclimate and thermal comfort in an urban park. *Int. Rev. Spat. Plan. Sustain. Dev.* 7, 18–30. [https://doi.org/10.14246/IRSPSD.7.1\\_18](https://doi.org/10.14246/IRSPSD.7.1_18)
- Li, Z.L., Duan, S.B., 2018. Land surface temperature, in: *Comprehensive Remote Sensing*. pp. 264–283.

- <https://doi.org/10.1016/B978-0-12-409548-9.10375-6>
- Li, Z.L., Tang, B.H., Wu, H., Ren, H., Yan, G., Wan, Z., Trigo, I.F., Sobrino, J.A., 2013. Satellite-derived land surface temperature: Current status and perspectives. *Remote Sens. Environ.* 131, 14–37. <https://doi.org/10.1016/j.rse.2012.12.008>
- Lin, J., Kroll, C.N., Nowak, D.J., Greenfield, E.J., 2019. A review of urban forest modeling: Implications for management and future research. *Urban For. Urban Green.* 43. <https://doi.org/10.1016/j.ufug.2019.126366>
- Lobaccaro, G., Acero, J.A., Martinez, G.S., Padro, A., Laburu, T., Fernandez, G., 2019. Effects of orientations, aspect ratios, pavement materials and vegetation elements on thermal stress inside typical urban canyons. *Int. J. Environ. Res. Public Health* 16. <https://doi.org/10.3390/ijerph16193574>
- Lynch, K., 1960. *The image of the city*. MIT press.
- Matzarakis, A., Rutz, F., Mayer, H., 2007. Modelling radiation fluxes in simple and complex environments - Application of the RayMan model. *Int. J. Biometeorol.* 51, 323–334. <https://doi.org/10.1007/s00484-006-0061-8>
- Mayer, H., 1993. Urban bioclimatology. *Experientia* 49, 957–963.
- Meier, F., Scherer, D., 2012. Spatial and temporal variability of urban tree canopy temperature during summer 2010 in Berlin, Germany. *Theor. Appl. Climatol.* 110, 373–384. <https://doi.org/10.1007/s00704-012-0631-0>
- Molla, M.B., 2015. The Value of Urban Green Infrastructure and Its Environmental Response in Urban Ecosystem: A Literature Review. *Int. J. Environ. Sci.* 4, 89–101.
- Morakinyo, T.E., Balogun, A.A., Adegun, O.B., 2013. Comparing the effect of trees on thermal conditions of two typical urban buildings. *Urban Clim.* 3, 76–93. <https://doi.org/10.1016/j.uclim.2013.04.002>
- Morakinyo, T.E., Lam, Y.F., 2016. Simulation study on the impact of tree-configuration, planting pattern and wind condition on street-canyon's micro-climate and thermal comfort. *Build. Environ.* 103, 262–275. <https://doi.org/10.1016/j.buildenv.2016.04.025>
- Motazedian, A., Leardini, P., 2012. Impact of green infrastructures on urban microclimates. A critical review, in: Griffith University - School of Environment - Department of Architecture, 2012 (Ed.), 46th Annual Conference of the Architectural Science Association (ANZAScA) 2012: Building on Knowledge: Theory and Practice.
- Murtinová, V., Gallay, I., Olah, B., 2022. Mitigating Effect of Urban Green Spaces on Surface Urban Heat Island during Summer Period on an Example of a Medium Size Town of Zvolen, Slovakia. *Remote Sens.* 14, 4492. <https://doi.org/10.3390/rs14184492>
- Noro, M., Lazzarin, R., 2015. Urban heat island in Padua, Italy: Simulation analysis and mitigation strategies. *Urban Clim.* 14, 187–196. <https://doi.org/10.1016/j.uclim.2015.04.004>
- Norton, B.A., Coutts, A.M., Livesley, S.J., Harris, R.J., Hunter, A.M., Williams, N.S.G., 2015. Planning for cooler cities: A framework to prioritise green infrastructure to mitigate high temperatures in urban landscapes. *Landsc. Urban Plan.* 134, 127–138. <https://doi.org/10.1016/j.landurbplan.2014.10.018>
- Nowak, D.J., Crane, D.E., Stevens, J.C., Hoehn, R.E., Walton, J.T., Bond, J., 2008. A Ground-Based Method of Assessing Urban Forest Structure and Ecosystem Services. *Arboric. Urban For.* 34, 347–358.
- Oke, T.R., 1988. Street design and urban canopy layer climate. *Energy Build.* 11, 103–113. [https://doi.org/10.1016/0378-7788\(88\)90026-6](https://doi.org/10.1016/0378-7788(88)90026-6)
- Oke, T.R., Mills, G., Christen, A., Voogt, J.A., 2017. *Urban climates, Urban Climates*. <https://doi.org/10.1017/9781139016476>
- Onishi, A., Cao, X., Ito, T., Shi, F., Imura, H., 2010. Evaluating the potential for urban heat-island mitigation by greening parking lots. *Urban For. Urban Green.* 9, 323–332. <https://doi.org/10.1016/j.ufug.2010.06.002>
- Ouyang, W., Morakinyo, T.E., Ren, C., Ng, E., 2020. The cooling efficiency of variable greenery coverage ratios in different urban densities: A study in a subtropical climate. *Build. Environ.* 174, 106772. <https://doi.org/10.1016/j.buildenv.2020.106772>
- Pickering, C., Byrne, J., 2014. The benefits of publishing systematic quantitative literature reviews for PhD candidates and other early-career researchers. *High. Educ. Res. Dev.* 33, 534–548. <https://doi.org/10.1080/07294360.2013.841651>
- Pinto, L.V., Inácio, M., Ferreira, C.S.S., Ferreira, A.D., Pereira, P., 2022. Ecosystem services and well-being dimensions related to urban green spaces – A systematic review. *Sustain. Cities Soc.* 85. <https://doi.org/10.1016/j.scs.2022.104072>
- Pisello, A.L., Saliari, M., Vasilakopoulou, K., Hadad, S., Santamouris, M., 2018. Facing the urban overheating: Recent developments. Mitigation potential and sensitivity of the main technologies. *Wiley Interdiscip. Rev. Energy Environ.* 7, 1–25. <https://doi.org/10.1002/wene.294>
- Pramanik, S., Punia, M., 2019. Assessment of green space cooling effects in dense urban landscape: a case study of
-

- Delhi, India. *Model. Earth Syst. Environ.* 5, 867–884. <https://doi.org/10.1007/s40808-019-00573-3>
- Rahman, M.A., Moser, A., Rötzer, T., Pauleit, S., 2019. Comparing the transpirational and shading effects of two contrasting urban tree species. *Urban Ecosyst.* 22, 683–697. <https://doi.org/10.1007/s11252-019-00853-x>
- Rahman, M.A., Stratopoulos, L.M.F., Moser-Reischl, A., Zölch, T., Häberle, K.H., Rötzer, T., Pretzsch, H., Pauleit, S., 2020. Traits of trees for cooling urban heat islands: A meta-analysis. *Build. Environ.* 170, 106606. <https://doi.org/10.1016/j.buildenv.2019.106606>
- Rashid, Z.A., Al Junid, S.A.M., Thani, S.K.S.O., 2014. Trees' cooling effect on surrounding air temperature monitoring system: Implementation and observation. *Int. J. Simul. Syst. Sci. Technol.* 15, 70–77. <https://doi.org/10.5013/IJSSST.a.15.02.10>
- Rasul, A., Balzter, H., Smith, C., 2015. Spatial variation of the daytime Surface Urban Cool Island during the dry season in Erbil, Iraqi Kurdistan, from Landsat 8. *Urban Clim.* 14, 176–186. <https://doi.org/10.1016/j.uclim.2015.09.001>
- Rodríguez-Morales, B., Rocas-Díaz, J. V., Kelemen, E., Pataki, G., Díaz-Varela, E., 2020. Perception of ecosystem services and disservices on a peri-urban communal forest: Are landowners' and visitors' perspectives dissimilar? *Ecosyst. Serv.* 43, 101089. <https://doi.org/10.1016/j.ecoser.2020.101089>
- Roy, S., Byrne, J., Pickering, C., 2012. A systematic quantitative review of urban tree benefits, costs, and assessment methods across cities in different climatic zones. *Urban For. Urban Green.* 11, 351–363. <https://doi.org/10.1016/j.ufug.2012.06.006>
- Rui, L., Buccolieri, R., Gao, Z., Gatto, E., Ding, W., 2019. Study of the effect of green quantity and structure on thermal comfort and air quality in an urban-like residential district by ENVI-met modelling. *Build. Simul.* 12, 183–194. <https://doi.org/10.1007/s12273-018-0498-9>
- Saaroni, H., Amorim, J.H., Hiemstra, J.A., Pearlmutter, D., 2018. Urban Green Infrastructure as a tool for urban heat mitigation: Survey of research methodologies and findings across different climatic regions. *Urban Clim.* 24, 94–110. <https://doi.org/10.1016/j.uclim.2018.02.001>
- Sabrin, S., Karimi, M., Nazari, R., Pratt, J., Bryk, J., 2021. Effects of Different Urban-Vegetation Morphology on the Canopy-level Thermal Comfort and the Cooling Benefits of Shade Trees: Case-study in Philadelphia. *Sustain. Cities Soc.* 66, 102684. <https://doi.org/10.1016/j.scs.2020.102684>
- Saha, M., Kafy, A. Al, Bakshi, A., Faisal, A. Al, Almulhim, A.I., Rahaman, Z.A., Al Rakib, A., Fattah, M.A., Akter, K.S., Rahman, M.T., Zhang, M., Rath, R., 2022. Modelling microscale impacts assessment of urban expansion on seasonal surface urban heat island intensity using neural network algorithms, *Energy and Buildings*. Elsevier B.V. <https://doi.org/10.1016/j.enbuild.2022.112452>
- Santamouris, M., Ban-Weiss, G., Osmond, P., Paolini, R., Synnefa, A., Cartalis, C., Muscio, A., Zinzi, M., Morakinyo, T.E., Ng, E., Tan, Z., Takebayashi, H., Sailor, D., Crank, P., Taha, H., Pisello, A.L., Rossi, F., Zhang, J., Kolokotsa, D., 2018. Progress in urban greenery mitigation science – assessment methodologies advanced technologies and impact on cities. *J. Civ. Eng. Manag.* 24, 638–671. <https://doi.org/10.3846/jcem.2018.6604>
- Schuurman, N., 2009. Spatial Ontologies. *Int. Encycl. Hum. Geogr.* <https://doi.org/10.1016/B978-008044910-4.00068-7>
- Shahidan, M., 2015. Potential of Individual and Cluster Tree Cooling Effect Performances Through Tree Canopy Density Model Evaluation in Improving Urban Microclimate. *Curr. World Environ.* 10, 398–413. <https://doi.org/10.12944/CWE.10.2.04>
- Shashua-Bar, L., Hoffman, M.E., 2000. Vegetation as a climatic component in the design of an urban street. *Energy Build.* 31, 221–235. [https://doi.org/10.1016/S0378-7788\(99\)00018-3](https://doi.org/10.1016/S0378-7788(99)00018-3)
- Shashua-Bar, L., Pearlmutter, D., Erell, E., 2011. The influence of trees and grass on outdoor thermal comfort in a hot-arid environment. *Int. J. Climatol.* 31, 1498–1506. <https://doi.org/10.1002/joc.2177>
- Souch, C.A., Souch, C., 1993. The effect of trees on summertime below canopy urban climates: a case study Bloomington, Indiana. *J. Arboric.* 19, 303–312.
- Spangenberg, J., Shinzato, P., Johansson, E., Duarte, D., 2019. Simulation of the Influence of Vegetation on Microclimate and Thermal Comfort in the City of São Paulo. *Rev. da Soc. Bras. Arborização Urbana* 3, 1. <https://doi.org/10.5380/revsbau.v3i2.66265>
- Stewart, I.D., Krayenhoff, E.S., Voogt, J.A., Lachapelle, J.A., Allen, M.A., Broadbent, A.M., 2021. Time Evolution of the Surface Urban Heat Island. *Earth's Futur.* 9. <https://doi.org/10.1029/2021EF002178>
- Stewart, I.D., Oke, T.R., 2012. Local climate zones for urban temperature studies. *Bull. Am. Meteorol. Soc.* 93, 1879–1900. <https://doi.org/10.1175/BAMS-D-11-00019.1>
- Su, W., Zhang, Y., Yang, Y., Ye, G., 2014. Examining the impact of greenspace patterns on land surface temperature by coupling LiDAR data with a CFD model. *Sustain.* 6, 6799–6814. <https://doi.org/10.3390/su6106799>
-

- Taleghani, M., Sailor, D., Ban-Weiss, G.A., 2016. Micrometeorological simulations to predict the impacts of heat mitigation strategies on pedestrian thermal comfort in a Los Angeles neighborhood. *Environ. Res. Lett.* 11, 24003. <https://doi.org/10.1088/1748-9326/11/2/024003>
- TEEB, 2010. The economics of ecosystems and biodiversity: Mainstreaming the economics of nature. A synthesis of the approach, conclusions and recommendations of TEEB. Geneva, Switzerland.
- Trihamdani, A.R., Lee, H.S., Kubota, T., Phuong, T.T.T., 2015. Configuration of green spaces for urban heat island mitigation and future building energy conservation in Hanoi Master Plan 2030. *Buildings* 5, 933–947. <https://doi.org/10.3390/buildings5030933>
- Tsiros, I.X., Hoffman, M.E., 2014. Thermal and comfort conditions in a semi-closed rear wooded garden and its adjacent semi-open spaces in a mediterranean climate (athens) during summer. *Archit. Sci. Rev.* 57, 63–82. <https://doi.org/10.1080/00038628.2013.829021>
- van Hove, L.W.A., Jacobs, C.M.J., Heusinkveld, B.G., Elbers, J.A., Van Driel, B.L., Holtslag, A.A.M., 2015. Temporal and spatial variability of urban heat island and thermal comfort within the Rotterdam agglomeration. *Build. Environ.* 83, 91–103. <https://doi.org/10.1016/j.buildenv.2014.08.029>
- Wallemacq, P., 2017. Economic Losses, Poverty & Disasters 1998-2017.
- Wang, Y., Akbari, H., 2016. The effects of street tree planting on Urban Heat Island mitigation in Montreal. *Sustain. Cities Soc.* 27, 122–128. <https://doi.org/10.1016/j.scs.2016.04.013>
- Wong, N.H., Tan, C.L., Kolokotsa, D.D., Takebayashi, H., 2021. Greenery as a mitigation and adaptation strategy to urban heat. *Nat. Rev. Earth Environ.* 2, 166–181. <https://doi.org/10.1038/s43017-020-00129-5>
- World Health Organization, 2014. Quantitative risk assessment of the effects of climate change on selected causes of death, 2030s and 2050s.
- Wu, Z., Chen, L., 2017. Optimizing the spatial arrangement of trees in residential neighborhoods for better cooling effects: Integrating modeling with in-situ measurements. *Landsc. Urban Plan.* 167, 463–472. <https://doi.org/10.1016/j.landurbplan.2017.07.015>
- Xiao, J., Yuizono, T., 2022. Climate-adaptive landscape design: Microclimate and thermal comfort regulation of station square in the Hokuriku Region, Japan. *Build. Environ.* 212, 108813. <https://doi.org/10.1016/j.buildenv.2022.108813>
- Xie, Q., Wu, Y., Zhou, Z., Wang, Z., 2018. Remote sensing study of the impact of vegetation on thermal environment in different contexts. *IOP Conf. Ser. Earth Environ. Sci.* 121. <https://doi.org/10.1088/1755-1315/121/2/022009>
- Yan, H., Fan, S., Guo, C., Wu, F., Zhang, N., Dong, L., 2014. Assessing the effects of landscape design parameters on intra-urban air temperature variability: The case of Beijing, China. *Build. Environ.* 76, 44–53. <https://doi.org/10.1016/j.buildenv.2014.03.007>
- Yan, J., Zhou, W., Jenerette, G.D., 2019. Testing an energy exchange and microclimate cooling hypothesis for the effect of vegetation configuration on urban heat. *Agric. For. Meteorol.* 279, 107666. <https://doi.org/10.1016/j.agrformet.2019.107666>
- Yu, Y., Liu, Y., Yu, P., Liu, Y., Yu, P., 2018. Land Surface Temperature Product Development for JPSS and GOES-R Missions. *Compr. Remote Sens.* 284–303. <https://doi.org/10.1016/B978-0-12-409548-9.10522-6>
- Zhang, L., Zhan, Q., Lan, Y., 2018. Effects of the tree distribution and species on outdoor environment conditions in a hot summer and cold winter zone: A case study in Wuhan residential quarters. *Build. Environ.* 130, 27–39. <https://doi.org/10.1016/j.buildenv.2017.12.014>
- Zhang, Z., Lv, Y., Pan, H., 2013. Cooling and humidifying effect of plant communities in subtropical urban parks. *Urban For. Urban Green.* 12, 323–329. <https://doi.org/10.1016/j.ufug.2013.03.010>
- Zhao, T.F., Fong, K.F., 2017. Characterization of different heat mitigation strategies in landscape to fight against heat island and improve thermal comfort in hot-humid climate (Part I): Measurement and modelling. *Sustain. Cities Soc.* 32, 523–531. <https://doi.org/10.1016/j.scs.2017.03.025>
- Zheng, B., Myint, S.W., Fan, C., 2014. Spatial configuration of anthropogenic land cover impacts on urban warming. *Landsc. Urban Plan.* 130, 104–111. <https://doi.org/10.1016/j.landurbplan.2014.07.001>
- Zheng, S., Guldmann, J.M., Liu, Z., Zhao, L., Wang, J., Pan, X., Zhao, D., 2020. Predicting the influence of subtropical trees on urban wind through wind tunnel tests and numerical simulations. *Sustain. Cities Soc.* 57, 102116. <https://doi.org/10.1016/j.scs.2020.102116>
- Zhou, W., Huang, G., Cadenasso, M.L., 2011. Does spatial configuration matter? Understanding the effects of land cover pattern on land surface temperature in urban landscapes. *Landsc. Urban Plan.* 102, 54–63. <https://doi.org/10.1016/j.landurbplan.2011.03.009>
- Zhou, W., Shen, X., Cao, F., Sun, Y., 2019. Effects of Area and Shape of Greenspace on Urban Cooling in Nanjing,

China. *J. Urban Plan. Dev.* 145, 1–9. [https://doi.org/10.1061/\(ASCE\)UP.1943-5444.0000520](https://doi.org/10.1061/(ASCE)UP.1943-5444.0000520)

Zupancic, T., Westmacott, C., Bulthuis, M., 2015. The impact of green space on heat and air pollution in urban communities: A meta-narrative systematic review. David Suzuki Foundation, Vancouver.
